# Supplementary material for: C(sp3)–H oxidation and chlorination catalysed by a bioinspired pincer iron(iii) complex
Source: Royal Society of Chemistry journal article supplement (doi:10.1039/d2dt02005j), 2022-01-01
Supplement: d2dt02005j1.pdf [file d2dt02005j1.pdf]

# C(sp<sup>3</sup>)-H Oxidation and Chlorination Catalysed by A Bioinspired Pincer Iron(III) Complex

Jian Han, Liming Tan, Yanjun Wan, Gang Li,\* and Stephen N. Anderson

*Department of Chemistry and Biochemistry, Utah State University, Logan, Utah 84322, United States of America*

## Supporting Information

### Table of Content

|                                                                         |    |
|-------------------------------------------------------------------------|----|
| 1. General Information.....                                             | 1  |
| 2. General Procedures for Fe(III) Catalysed C-H Functionalisation ..... | 1  |
| 3. Experimental Data for Fe(III) Catalysed C-H Functionalisation.....   | 3  |
| 4. NMR Spectra of Compounds.....                                        | 10 |
| 5. X-ray Crystal Structure and Data of catalyst 1 .....                 | 20 |
| 6. References.....                                                      | 26 |

## 1. General Information

Unless otherwise specified, the chemicals (AR grade) were obtained from commercial sources and were used without further purification. Fe(III) catalysts **1**<sup>1,2</sup> was synthesized according to reported procedures. The progress of the reactions was monitored by TLC (silica gel, Polygram SILG/UV 254 plates). Column chromatography was performed on silica gel (200-300 mesh). <sup>1</sup>H and <sup>13</sup>C NMR spectra were recorded at 500 MHz and 125 MHz, respectively, and CDCl<sub>3</sub>, was used as the solvent with TMS as the internal standard. GC-MS was performed on a Shimadzu GC-2010 Gas Chromatograph (GC column: Shimadzu SHR5XLB) equipped with a Shimadzu GCMS-QP2010S Mass Selective Detector. UV-vis spectra were performed on an Agilent Cary 100 UV-vis spectrophotometer using a 1-cm quartz cuvette. UV-vis kinetic studies were performed on a Hewlett Packard 8453 UV-vis spectrophotometer using a 1-cm quartz cuvette. A single crystal of complex name was mounted on glass fiber loop using paratone oil. Collection of the data was done on a Rigaku XtaLAB Mini II Diffractometer using MoK $\alpha$  ( $\lambda = 0.71073 \text{ \AA}$ ) radiation source at 293.7 (min) – 296.4 (max) K. The absorption correction was done using a Gaussian grid with a 0.5 mm 1D horizontal Gaussian beam correction for the graphite monochromator. The structure was solved in Olex2<sup>3</sup> with SHELXT<sup>4</sup> using intrinsic phasing method and refined using the SHELXL program with the least square method. All non-hydrogen atoms were refined with anisotropic thermal parameters. The hydrogen atoms were placed in geometrically calculated positions and further refined using a riding model. Isotropic parameters of all hydrogen atoms were fixed to 1.2 times the U value of the atoms with the methyl groups being 1.5 times U.

Gas chromatograph methods used for substrate characterization:

| Compounds            | cyclohexane and cycloheptane         | cyclooctane and cyclododecane        | <i>cis</i> -decalin and (+)-sclareolide |
|----------------------|--------------------------------------|--------------------------------------|-----------------------------------------|
| Initial temperature  | 40 °C                                | 50 °C                                | 50 °C                                   |
| Ramp1                | 5 °C/min to 100 °C                   | 15 °C/min to 200 °C                  | 25 °C/min to 200 °C                     |
| Ramp2                | 100 °C/min to 300 °C, hold for 3 min | 100 °C/min to 300 °C, hold for 3 min | 50 °C/min to 300 °C, hold for 3 min     |
| Injector temperature | 250 °C                               | 250 °C                               | 250 °C                                  |
| Detector temperature | 340 °C                               | 300 °C                               | 300 °C                                  |

## 2. General Procedures for Fe(III) Catalysed C-H Functionalisation

### 2.1 C-H oxidation of aliphatic substrates

To a 25 mL flask equipped with a magnetic stir bar, Fe(III) catalyst **1** (0.025 mmol, 5 mol%) and substrate (0.5 mmol, 1.0 equiv.) in 5 mL HFIP were added. Then *m*-CPBA (1.5 mmol, 3 equiv.) was added in one batch. After completion of charging, the mixture was stirred for 0.5 h at room temperature. After the reaction is done, the reaction solution was filtered through a short plug of silica gel. The filtrate was analysed directly by GC/MS. For isolated product, after the reaction is done, the mixture was carefully concentrated in vacuum. The residue was diluted with saturated aqueous sodium bicarbonate and extracted with dichloromethane (3 times). The combined organic layer was washed with water, dried with anhydrous Na<sub>2</sub>SO<sub>4</sub>. The mixture was concentrated in vacuum and purified by

silica gel flash column chromatography eluting with hexane / ethyl acetate to afford the corresponding product.

## 2.2 Competition experiment

To a 25 mL flask equipped with a magnetic stir bar, Fe(III) catalyst **1** (0.025 mmol, 5 mol%), cyclohexanol (0.25 mmol, 0.5 equiv.), and cyclooctane (0.25 mmol, 0.5 equiv.) in 5 mL HFIP were added. Then *m*-CPBA (1.5 mmol, 3 equiv.) was added in portions (3-6 batches). After completion of charging, the mixture was stirred at room temperature. After the reaction is done, an aliquot was taken and run through a silica plug. The mixture was then analysed by GC-MS.

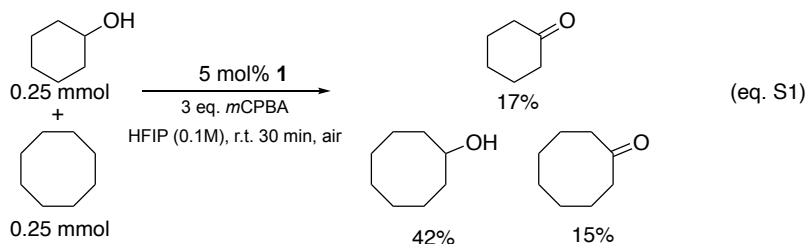

## 2.3 C-H oxidation of benzylic substrates

To a 25 mL flask equipped with a magnetic stir bar, Fe(III) catalyst **1** (0.025 mmol, 5 mol%) and substrate (0.5 mmol, 1.0 equiv.) in 5 mL HFIP were added. Then *m*-CPBA (1.5 mmol, 3 equiv.) was added in portions (3-6 batches). After completion of charging, the mixture was stirred at room temperature. After the reaction is done, the mixture was carefully concentrated in vacuum. The residue was diluted with saturated aqueous sodium bicarbonate and extracted with dichloromethane (3 times). The combined organic layer was washed with water, dried with anhydrous Na<sub>2</sub>SO<sub>4</sub>. The mixture was concentrated in vacuum and purified by silica gel flash column chromatography eluting with hexane / ethyl acetate to afford the corresponding product.

## 2.4 C-H chlorination

To a 25 mL flask equipped with a magnetic stir bar, Fe(III) catalyst **1** (0.025 mmol, 5 mol%) and substrate (0.5 mmol, 1.0 equiv.) in 5 mL HFIP were added. Then sodium hypochlorite solution (0.5 M, 3 equiv.) was added in portions (3-6 batches). After completion of charging, the mixture was stirred at room temperature. After the reaction is done, the mixture was extracted with dichloromethane (3 times). The combined organic layer was washed with water, dried with anhydrous Na<sub>2</sub>SO<sub>4</sub>. The mixture was concentrated in vacuum and purified by silica gel flash column chromatography eluting with hexane / ethyl acetate to afford the corresponding product.

### 3. Experimental Data for Fe(III) Catalysed C-H Functionalisation

#### 3.1 GC trace of C-H oxidation

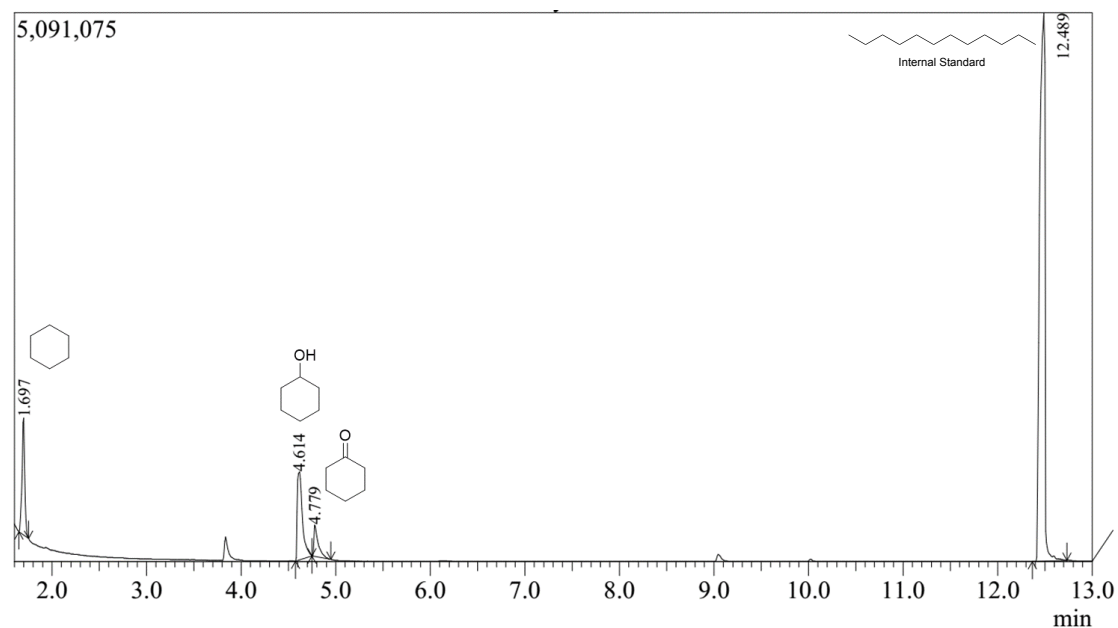

| Peak# | R.Time | I.Time | F.Time | Peak Report TIC |        | Height  | Height% | A/H  |
|-------|--------|--------|--------|-----------------|--------|---------|---------|------|
|       |        |        |        | Area            | Area%  |         |         |      |
| 1     | 1.697  | 1.650  | 1.750  | 2231869         | 8.58   | 1087146 | 14.93   | 2.05 |
| 2     | 4.614  | 4.575  | 4.750  | 3058471         | 11.75  | 815770  | 11.20   | 3.74 |
| 3     | 4.779  | 4.750  | 4.950  | 922580          | 3.55   | 291916  | 4.01    | 3.17 |
| 4     | 12.489 | 12.367 | 12.733 | 19811638        | 76.13  | 5086819 | 69.86   | 3.89 |
|       |        |        |        | 26024558        | 100.00 | 7281651 | 100.00  |      |

Figure S1. GC analysis of Fe(III)-catalysed oxidation of cyclohexane

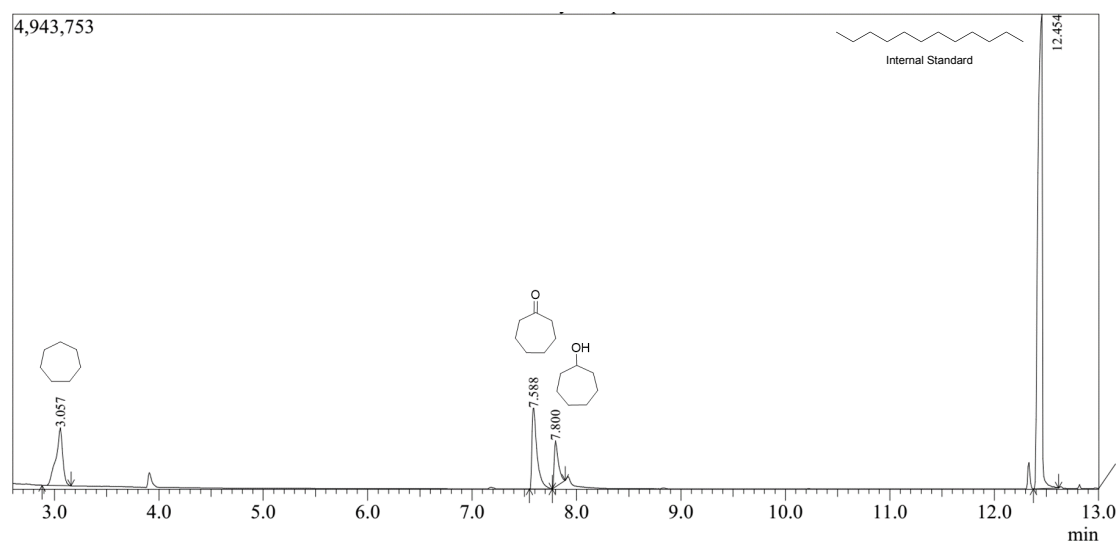

| Peak# | R.Time | I.Time | F.Time | Peak Report TIC |        | Height  | Height% | A/H  |
|-------|--------|--------|--------|-----------------|--------|---------|---------|------|
|       |        |        |        | Area            | Area%  |         |         |      |
| 1     | 3.057  | 2.883  | 3.158  | 2699804         | 12.36  | 602573  | 8.79    | 4.48 |
| 2     | 7.588  | 7.550  | 7.767  | 2783998         | 12.75  | 840337  | 12.25   | 3.31 |
| 3     | 7.800  | 7.767  | 7.892  | 1391791         | 6.37   | 478410  | 6.98    | 2.89 |
| 4     | 12.454 | 12.375 | 12.617 | 14964110        | 68.52  | 4936267 | 71.98   | 3.03 |
|       |        |        |        | 21839703        | 100.00 | 6857587 | 100.00  |      |

Figure S2. GC analysis of Fe(III)-catalysed oxidation of cycloheptane

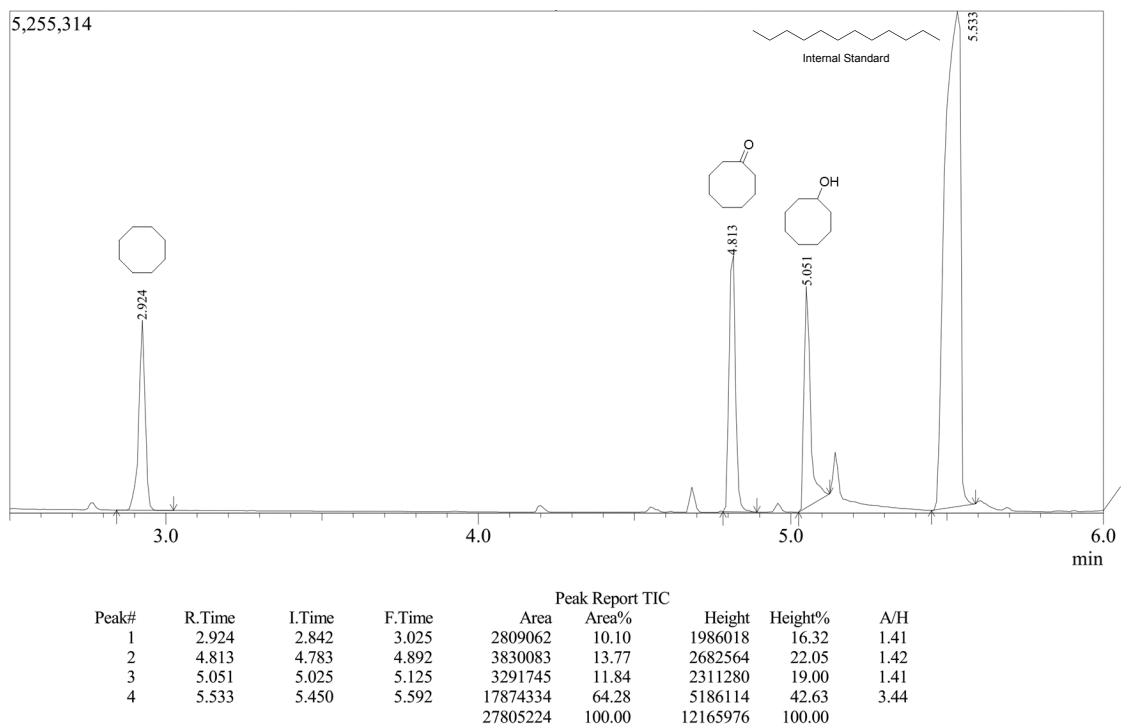

Figure S3. GC analysis of Fe(III)-catalysed oxidation of cyclooctane

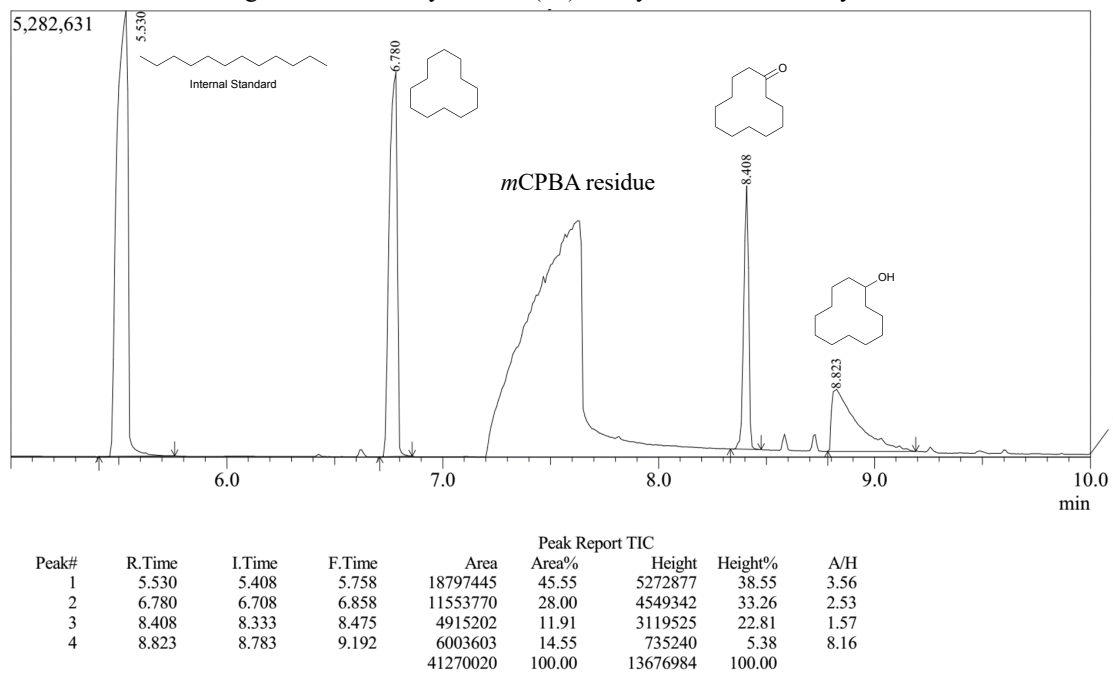

Figure S4. GC analysis of Fe(III)-catalysed oxidation of cyclododecane

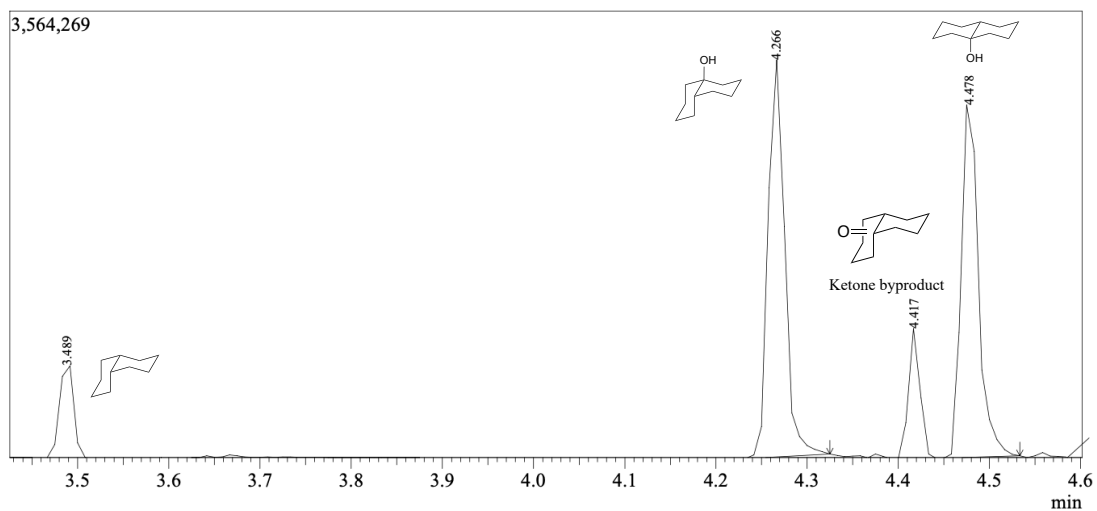

| Peak Report TIC |        |        |        |         |        |         |         |      |      |
|-----------------|--------|--------|--------|---------|--------|---------|---------|------|------|
| Peak#           | R.Time | I.Time | F.Time | Area    | Area%  | Height  | Height% | A/H  | Mark |
| 1               | 3.489  | 3.458  | 3.525  | 807727  | 8.51   | 732323  | 9.48    | 1.10 | MI   |
| 2               | 4.266  | 4.225  | 4.325  | 4033299 | 42.49  | 3154371 | 40.84   | 1.27 | MI   |
| 3               | 4.417  | 4.392  | 4.442  | 921164  | 9.70   | 1034927 | 13.40   | 0.88 | MI   |
| 4               | 4.478  | 4.450  | 4.533  | 3730078 | 39.30  | 2801755 | 36.28   | 1.33 | MI   |
|                 |        |        |        | 9492268 | 100.00 | 7723376 | 100.00  |      |      |

Figure S5. GC analysis of Fe(III)-catalysed oxidation of *cis*-decalin

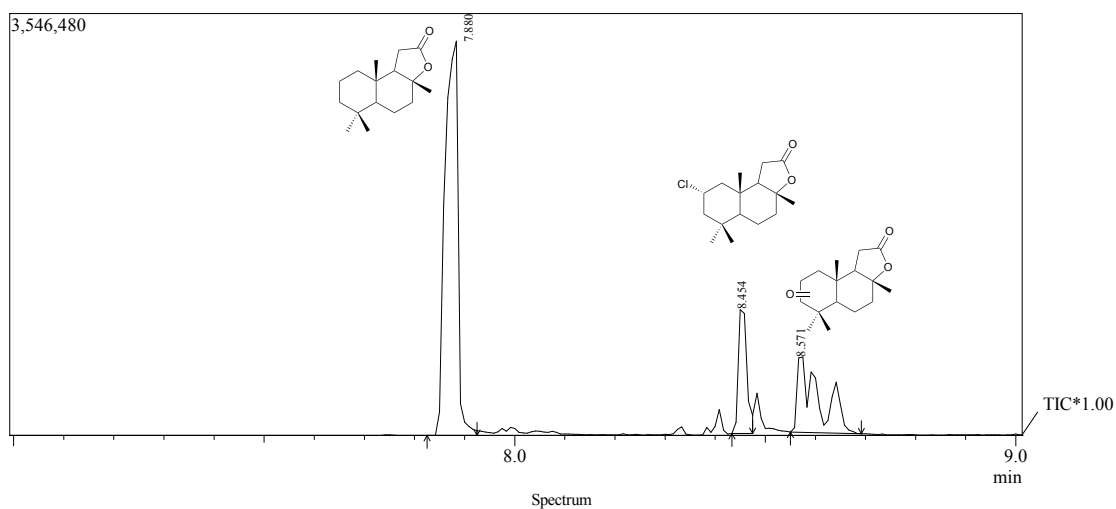

Line#:1 R.Time:8.458(Scan#:860)  
 MassPeaks:96  
 RawMode:Single 8.458(860) BasePeak:43.00(72860)  
 BG Mode:None Group 1 - Event 1

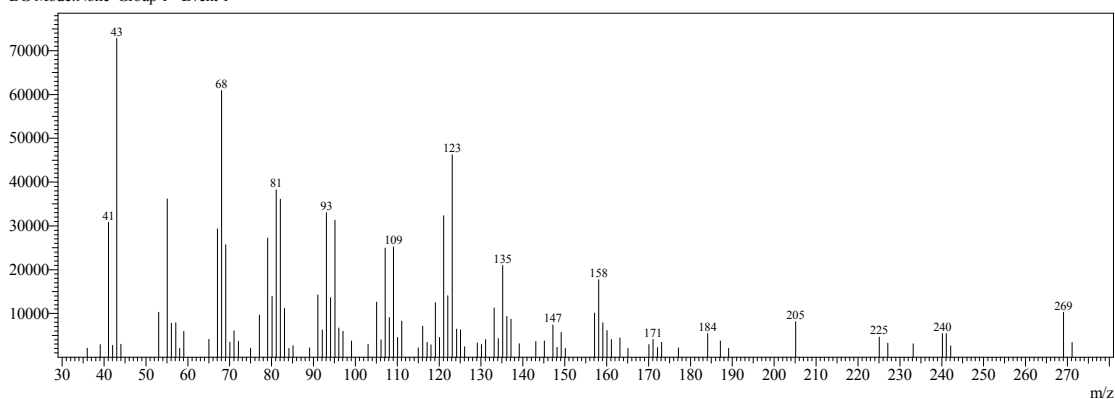

| Peak Report TIC |        |        |        |         |        |         |             |
|-----------------|--------|--------|--------|---------|--------|---------|-------------|
| Peak#           | R.Time | I.Time | F.Time | Area    | Area%  | Height  | Height% A/H |
| 1               | 7.880  | 7.825  | 7.925  | 6004811 | 64.88  | 3316747 | 66.471.81   |
| 2               | 8.454  | 8.433  | 8.475  | 1283113 | 13.86  | 1041218 | 20.871.23   |
| 3               | 8.571  | 8.550  | 8.692  | 1967253 | 21.26  | 631961  | 12.663.11   |
|                 |        |        |        | 9255177 | 100.00 | 4989926 | 100.00      |

Figure S6. GC analysis of Fe(III)-catalysed chlorination of sclareolide. The chlorination product was confirmed by comparing with authentic compound synthesized according to literature report.<sup>6</sup>

### 3.2 Kinetic profiles of iron oxo decay in the presence of substrates

Experiments were recorded on a Hewlett Packard 8453 UV-vis spectrophotometer using a 1-cm quartz cuvette at 0 °C. Concentration of iron oxo intermediate was calculated using an extinction coefficient value  $\epsilon = 1126 \text{ M}^{-1} \text{ cm}^{-1}$  calculated from Figure 1 in the main text.

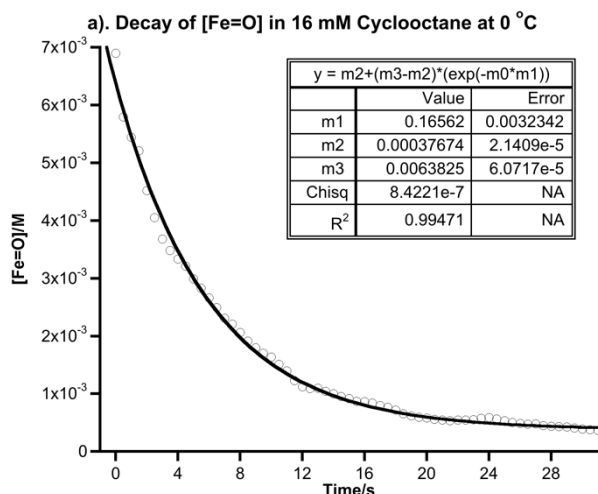

Figure S7. Decay of iron oxo intermediate in 0.16 mM cyclooctane.  $k_{\text{obs}} = 0.165(3) \text{ s}^{-1}$ .

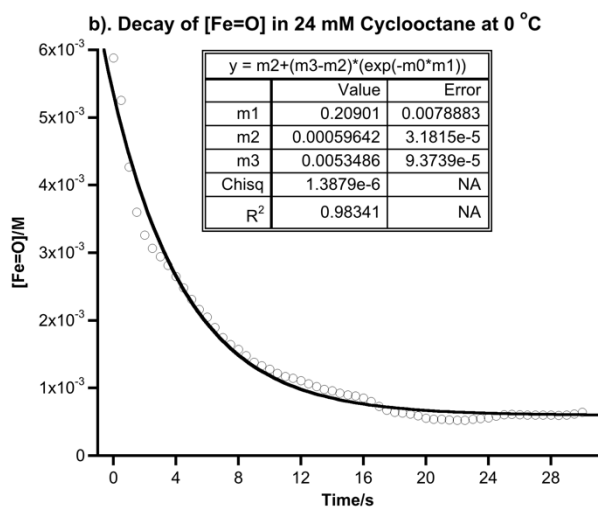

Figure S8. Decay of iron oxo intermediate in 0.24 mM cyclooctane.  $k_{\text{obs}} = 0.209(8) \text{ s}^{-1}$ .

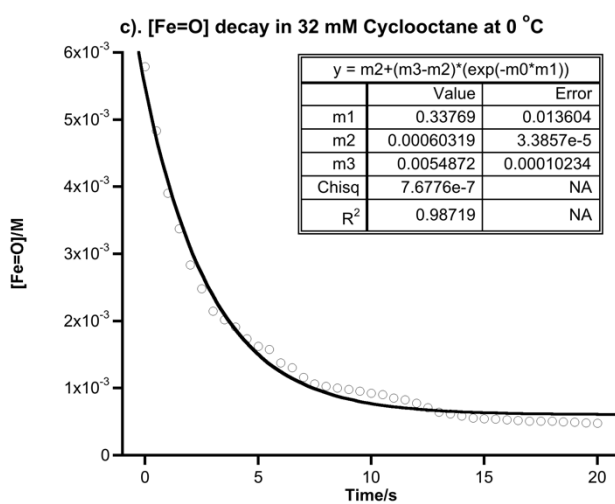

Figure S9. Decay of iron oxo intermediate in 0.32 mM cyclooctane.  $k_{\text{obs}} = 0.34(1) \text{ s}^{-1}$ .



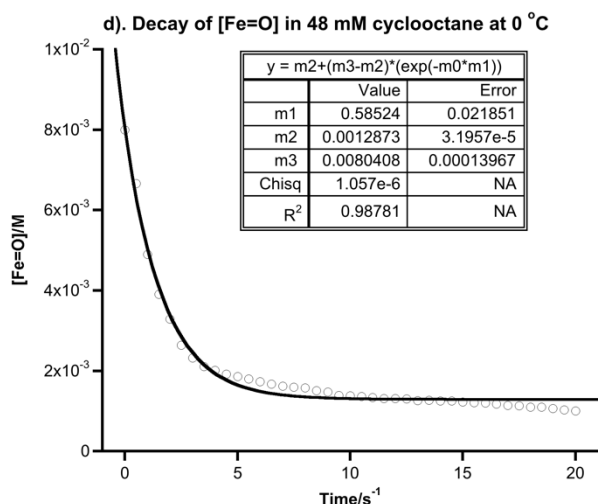

Figure S10. Decay of iron oxo intermediate in 0.48 mM cyclooctane.  $k_{\text{obs}} = 0.59(2) \text{ s}^{-1}$ .

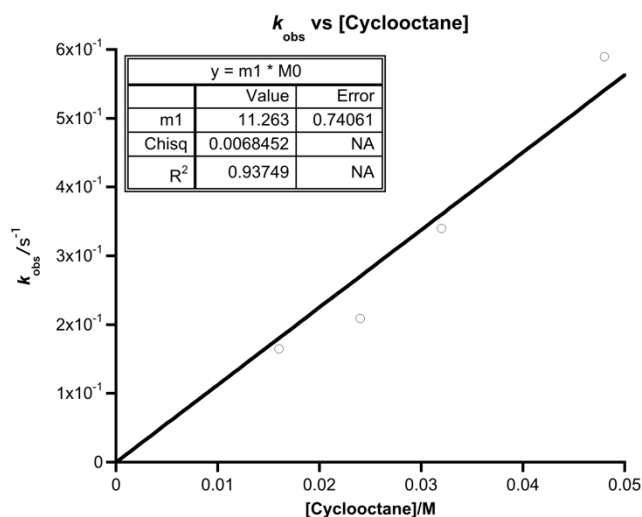

Figure S11. Second order rate constant for the C-H functionalization step at 0 °C.  $k = 11.3(7) \text{ M}^{-1}\text{s}^{-1}$ .

### 3.3 Product Characterization

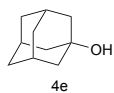

1-adamantanol (**4e**): Synthesized according to the general procedure, and isolated as a white solid (51 mg, 77%). <sup>1</sup>H NMR (500 MHz, CDCl<sub>3</sub>),  $\delta$  (ppm): 2.16 (s, 3H), 1.73 (d,  $J = 2 \text{ Hz}$ , 6H), 1.64 (q,  $J = 12 \text{ Hz}$ , 6H), 1.37-1.39 (m, 1H); <sup>13</sup>C NMR (125 MHz, CDCl<sub>3</sub>),  $\delta$  (ppm): 68.20, 45.34, 36.08, 30.72.

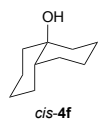

*cis*-9-Decalol (*cis*-**4f**): Synthesized according to the general procedure, and isolated as a colorless oil (28 mg, 42%). <sup>1</sup>H NMR (500 MHz, CDCl<sub>3</sub>),  $\delta$  (ppm): 1.27-1.91 (m, 18H); <sup>13</sup>C NMR (125 MHz, CDCl<sub>3</sub>),  $\delta$  (ppm): 72.1, 42.7, 29.7, 20.6. The spectra match previous report.<sup>5</sup>

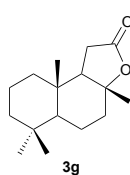

(+)-sclareolide (**3g**): Synthesized according to the general procedure, and isolated as a white solid (51 mg, 50%). <sup>1</sup>H NMR (500 MHz, CDCl<sub>3</sub>),  $\delta$  (ppm): 2.23-2.45 (m, 2H), 1.96-2.11 (m, 3H), 1.64-1.74 (m, 2H), 1.34-1.51 (m, 7H), 1.18-1.28 (m, 1H), 1.03-1.09 (m, 2H), 0.93 (s, 3H), 0.91 (s, 3H), 0.86 (s, 3H); <sup>13</sup>C NMR (125 MHz, CDCl<sub>3</sub>),  $\delta$  (ppm): 176.85, 86.36, 59.11, 56.65, 42.17, 39.50, 38.71, 36.05, 33.16, 28.71, 21.57, 20.92, 20.56, 18.09, 15.07.

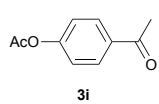

4-acetylphenyl acetate (**3i**): Synthesized according to the general procedure, and isolated as a white solid (49 mg, 55%). <sup>1</sup>H NMR (500 MHz, CDCl<sub>3</sub>), δ (ppm): 8.01 (d, *J* = 9 Hz, 2H), 7.22 (d, *J* = 9 Hz, 2H), 2.62 (s, 3H), 2.35 (s, 3H); <sup>13</sup>C NMR (125 MHz, CDCl<sub>3</sub>), δ (ppm): 196.82, 168.85, 154.35, 134.74, 129.94, 121.77, 26.60, 21.16.

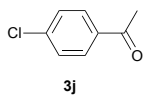

4-chloroacetophenone (**3j**): Synthesized according to the general procedure, and isolated as a yellow oil (45 mg, 59%). <sup>1</sup>H NMR (500 MHz, CDCl<sub>3</sub>), δ (ppm): 7.91 (d, *J* = 8.5 Hz, 2H), 7.45 (d, *J* = 8.5 Hz, 2H), 2.61 (s, 3H); <sup>13</sup>C NMR (125 MHz, CDCl<sub>3</sub>), δ (ppm): 196.79, 139.56, 135.44, 129.72, 128.89, 26.56.

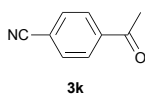

4-cyanoacetophenone (**3k**): Synthesized according to the general procedure, and isolated as a colorless oil (23 g, 32%). <sup>1</sup>H NMR (500 MHz, CDCl<sub>3</sub>), δ (ppm): 8.04-8.06 (m, 2H), 7.78-7.79 (m, 2H), 2.66 (s, 3H); <sup>13</sup>C NMR (125 MHz, CDCl<sub>3</sub>), δ (ppm): 196.51, 139.92, 132.52, 128.70, 117.92, 116.43, 26.77.

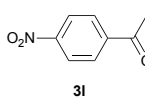

4-nitroacetophenone (**3l**): Synthesized according to the general procedure, and isolated as a colorless oil (35 mg, 42%). <sup>1</sup>H NMR (500 MHz, CDCl<sub>3</sub>), δ (ppm): 8.33 (d, *J* = 9 Hz, 2H), 8.13 (d, *J* = 9 Hz, 2H), 2.70 (s, 3H); <sup>13</sup>C NMR (125 MHz, CDCl<sub>3</sub>), δ (ppm): 196.29, 150.37, 141.38, 129.3, 123.86, 26.99.

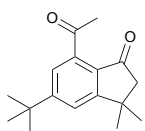

7-acetyl-5-(tert-butyl)-3,3-dimethyl-2,3-dihydro-1H-inden-1-one (**3m**): Synthesized according to the general procedure, and isolated as a white solid (100 mg, 78%). <sup>1</sup>H NMR (500 MHz, CDCl<sub>3</sub>), δ (ppm): 7.55 (d, *J* = 1.5 Hz, 1H), 7.33 (d, *J* = 1.5 Hz, 1H), 2.63 (s, 3H), 2.61 (s, 2H), 1.43 (s, 6H), 1.36 (s, 9H); <sup>13</sup>C NMR (125 MHz, CDCl<sub>3</sub>), δ (ppm): 204.65, 204.02, 164.57, 159.38, 139.18, 129.34, 123.23, 121.77, 53.23, 38.69, 35.76, 31.12, 30.93, 30.02.

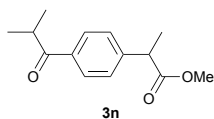

methyl 2-(4-isobutyrylphenyl)propanoate (**3n**): Synthesized according to the general procedure, and isolated as a colorless oil (55 mg, 47%). <sup>1</sup>H NMR (500 MHz, CDCl<sub>3</sub>), δ (ppm): 7.94 (d, *J* = 8 Hz, 2H), 7.41 (d, *J* = 8 Hz, 2H), 3.81 (q, *J* = 7 Hz, 1H), 3.70 (s, 3H), 3.56 (hept, *J* = 7 Hz, 1H), 1.55 (d, *J* = 7 Hz, 3H), 1.23 (d, *J* = 7 Hz, 6H); <sup>13</sup>C NMR (125 MHz, CDCl<sub>3</sub>), δ (ppm): 203.95, 174.31, 145.46, 135.14, 128.76, 127.81, 52.20, 45.40, 35.34, 19.14, 18.41.

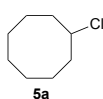

chlorocyclooctane (**5a**): Synthesized according to the general procedure, and isolated as a colorless oil (32 mg, 45%). <sup>1</sup>H NMR (500 MHz, CDCl<sub>3</sub>), δ (ppm): δ 4.25 (t, *J* = 4 Hz, 1H), 2.11-2.17 (m, 2H), 1.97-2.05 (m, 2H), 1.74-1.82 (m, 2H), 1.48-1.61 (m, 8H); <sup>13</sup>C NMR (125 MHz, CDCl<sub>3</sub>), δ (ppm): 63.59, 35.16, 27.40, 24.93, 23.57.

## 4. NMR Spectra of Compounds

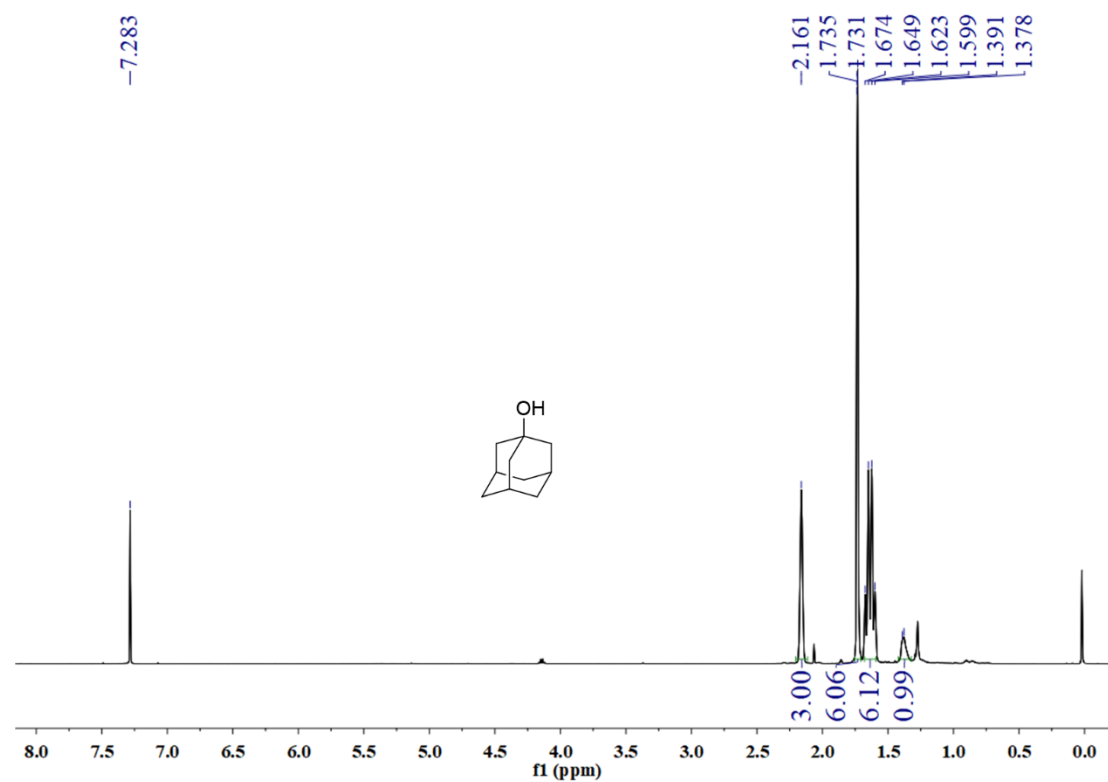

Figure S12  $^1\text{H}$  NMR spectrum of 1-Adamantanol ( $\text{CDCl}_3$ , 500 MHz)

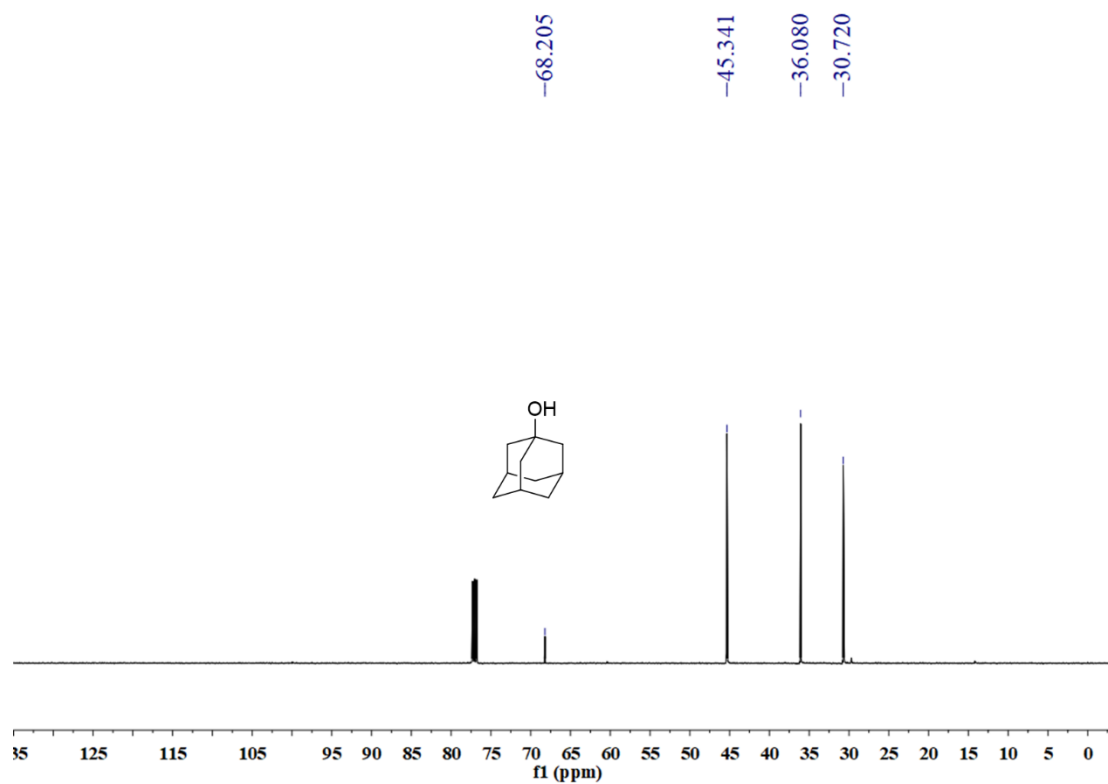

Figure S13  $^{13}\text{C}$  NMR spectrum of 1-Adamantanol ( $\text{CDCl}_3$ , 125 MHz)

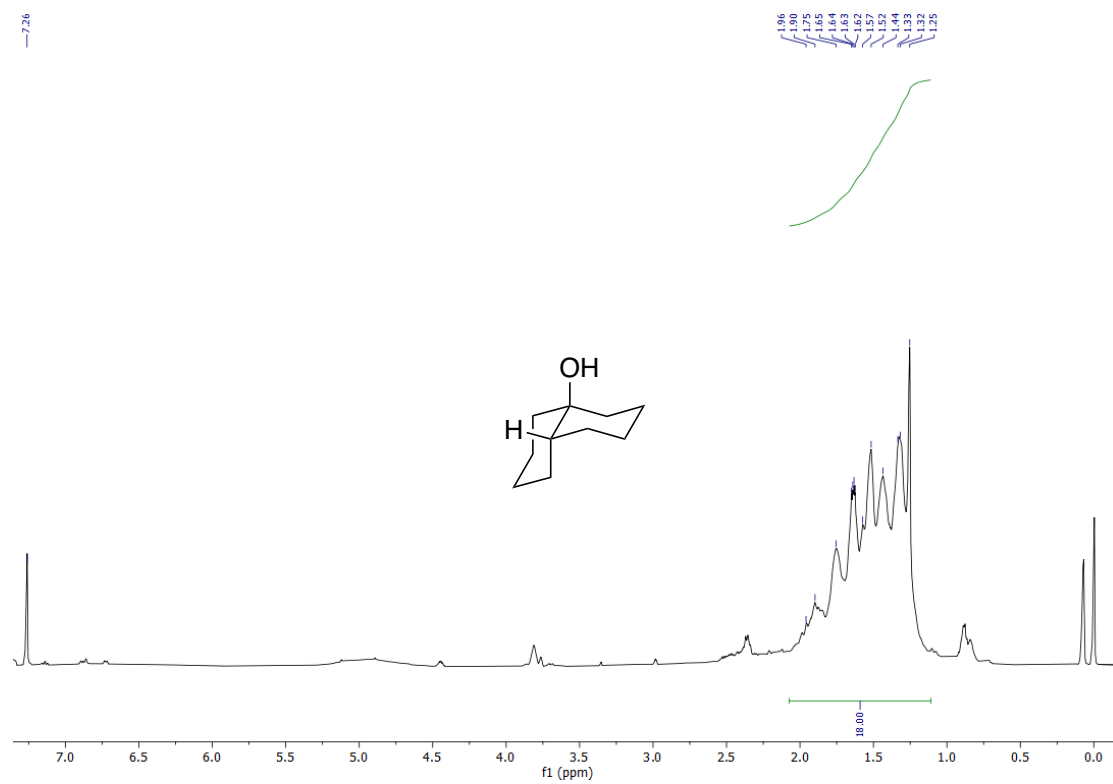

Figure S14  $^1\text{H}$  NMR spectrum of *cis*-9-decalinol ( $\text{CDCl}_3$ , 500 MHz)

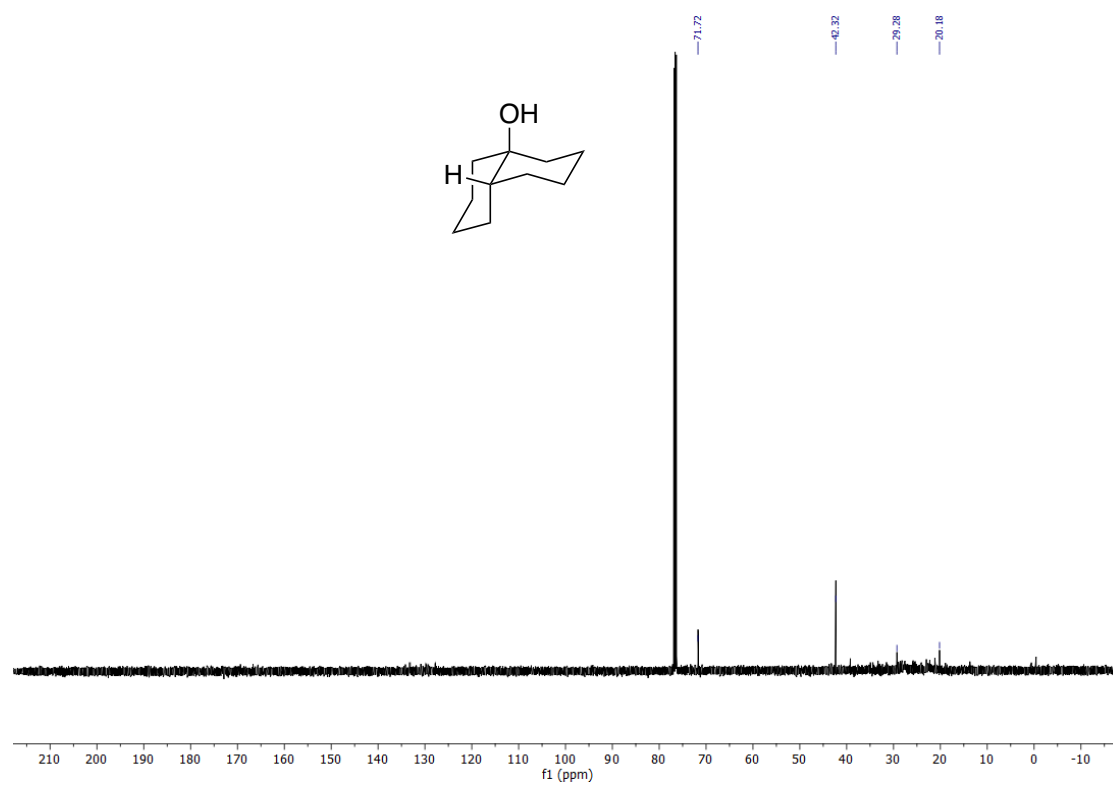

Figure S15  $^{13}\text{C}$  NMR spectrum of *cis*-9-decalinol ( $\text{CDCl}_3$ , 125 MHz)

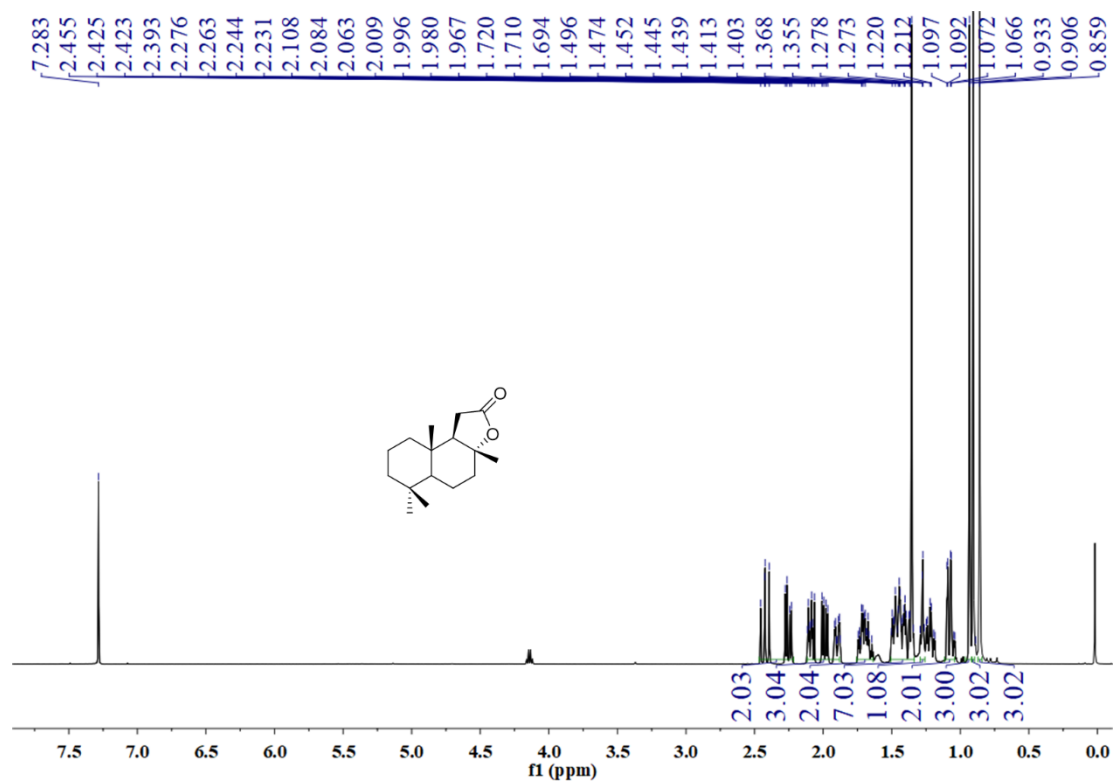

Figure S16  $^1\text{H}$  NMR spectrum of (3aR)-(+)-Sclareolide ( $\text{CDCl}_3$ , 500 MHz)

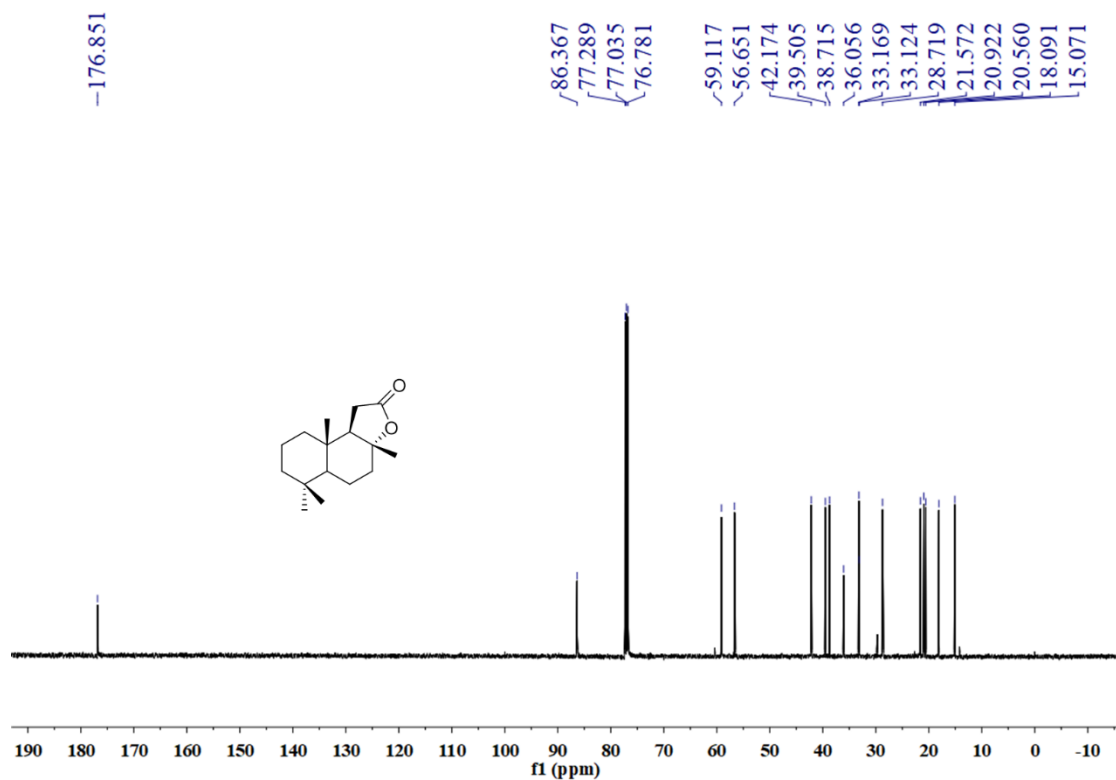

Figure S17  $^{13}\text{C}$  NMR spectrum of (3aR)-(+)-Sclareolide ( $\text{CDCl}_3$ , 125 MHz)

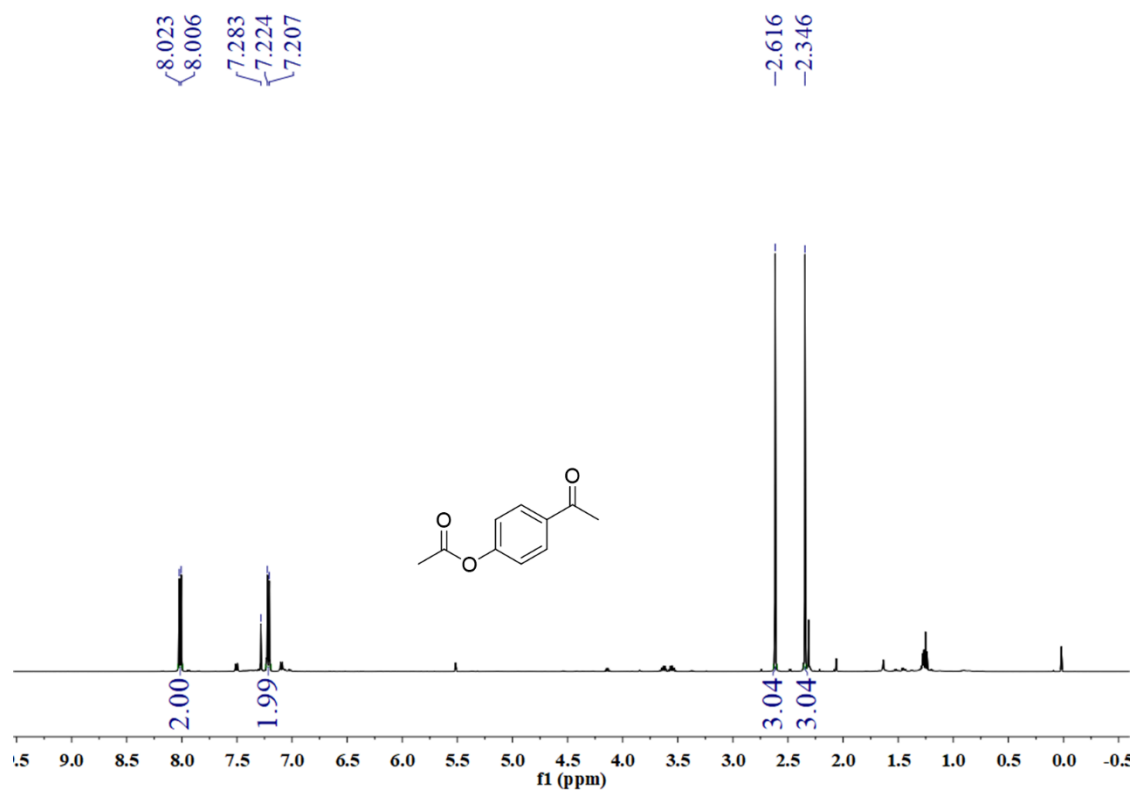

Figure S18  $^1\text{H}$  NMR spectrum of 4-Acetylphenyl acetate ( $\text{CDCl}_3$ , 500 MHz)

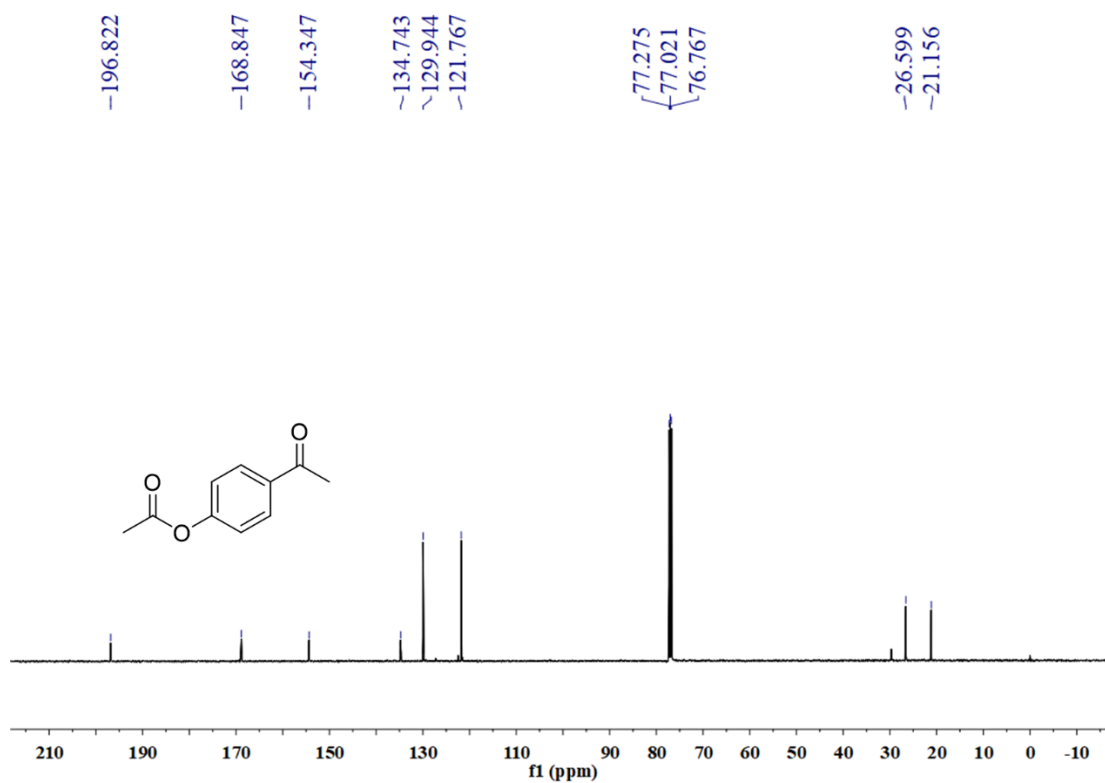

Figure S19  $^{13}\text{C}$  NMR spectrum of 4-Acetylphenyl acetate ( $\text{CDCl}_3$ , 125 MHz)

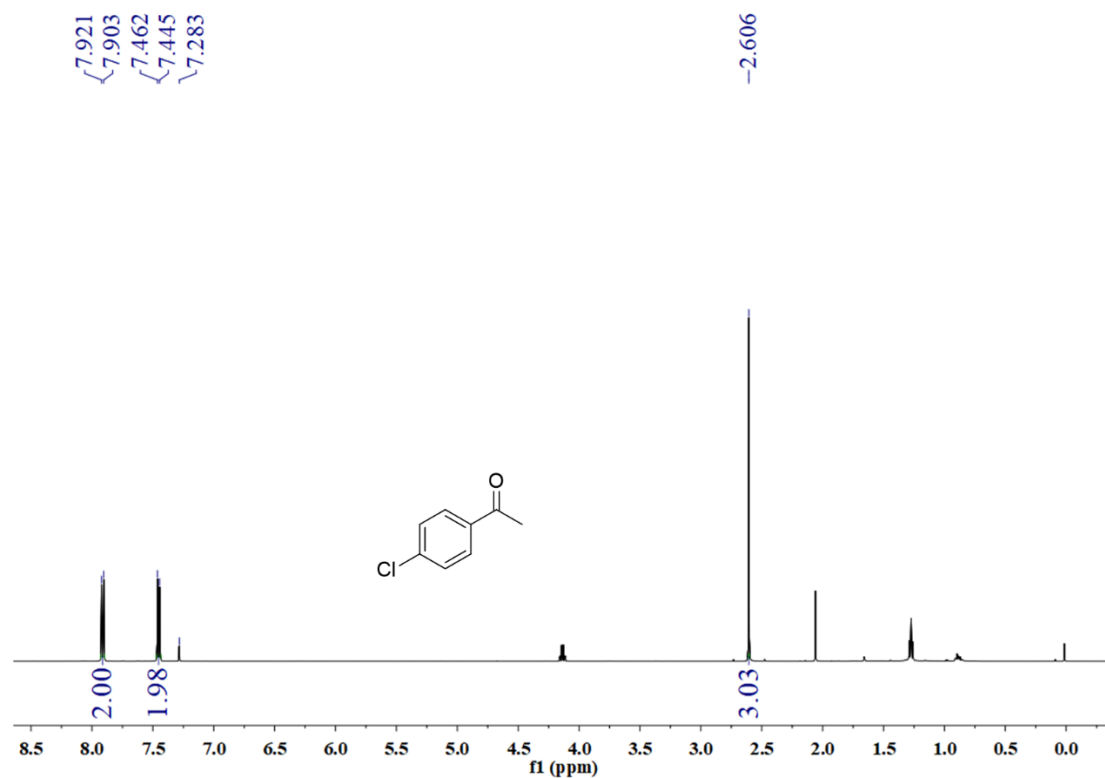

Figure S20 <sup>1</sup>H NMR spectrum of 4-Chloroacetophenone (CDCl<sub>3</sub>, 500 MHz)

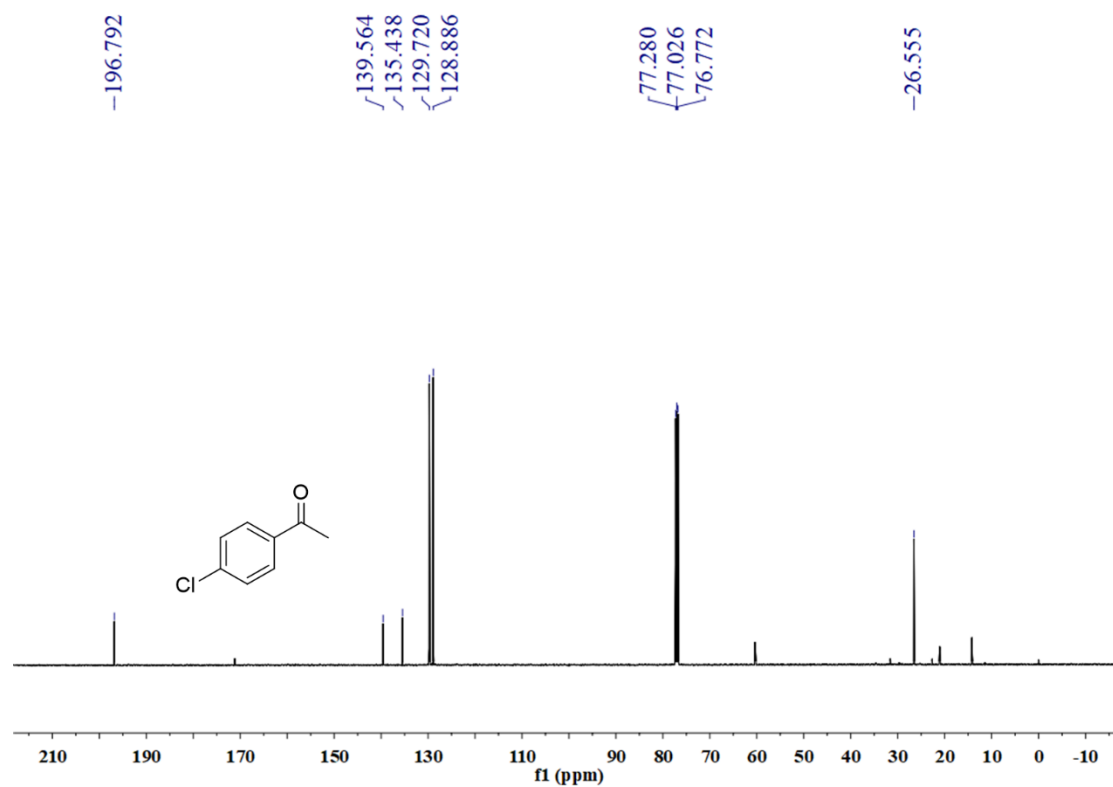

Figure S21 <sup>13</sup>C NMR spectrum of 4-Chloroacetophenone (CDCl<sub>3</sub>, 125 MHz)

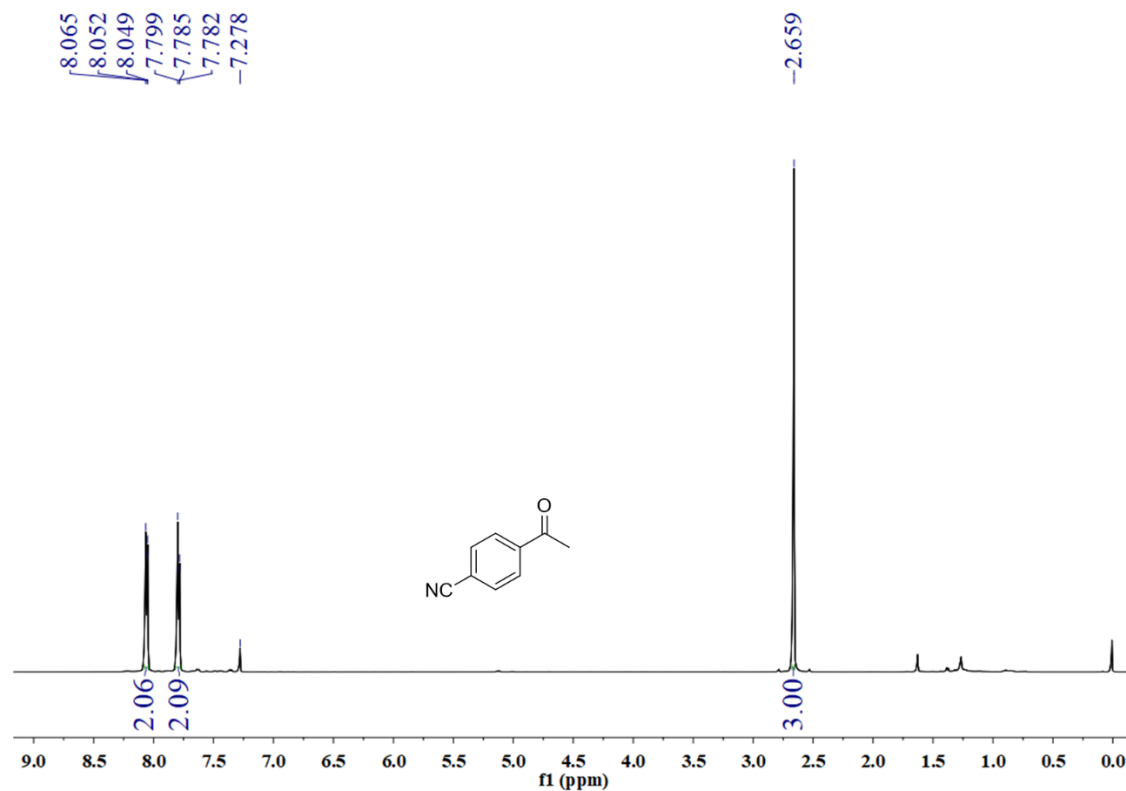

Figure S22  $^1\text{H}$  NMR spectrum of 4-Cyanoacetophenone ( $\text{CDCl}_3$ , 500 MHz)

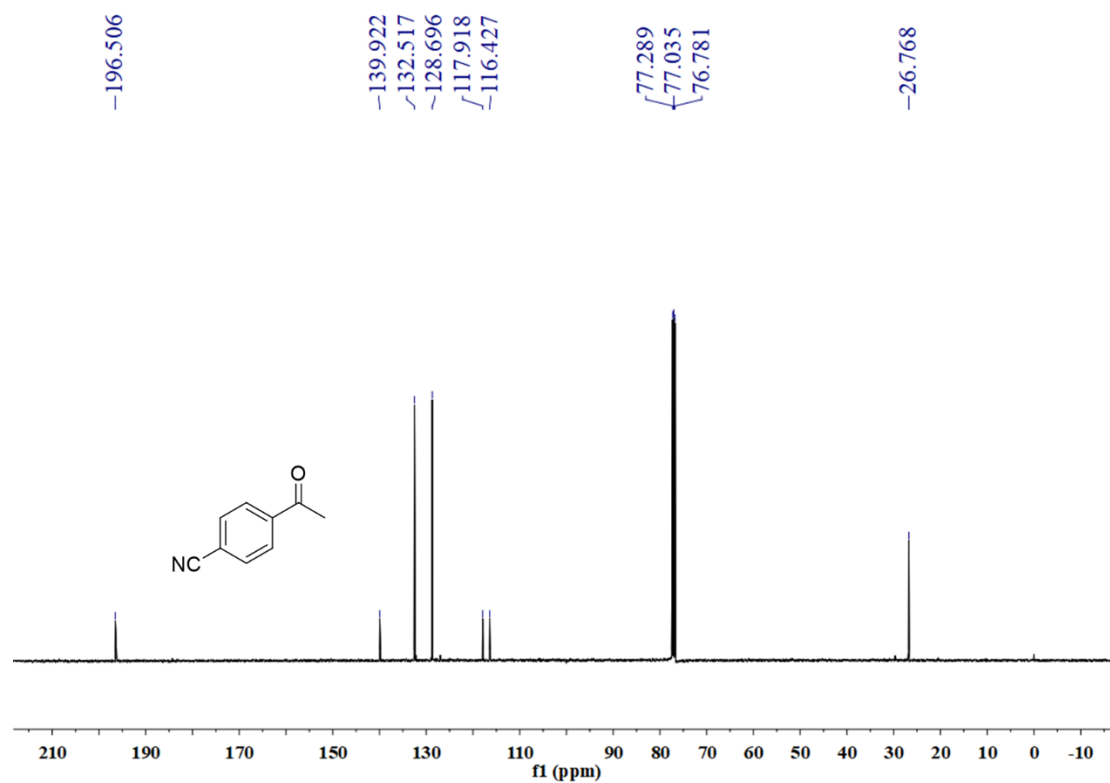

Figure S23  $^{13}\text{C}$  NMR spectrum of 4-Cyanoacetophenone ( $\text{CDCl}_3$ , 125 MHz)



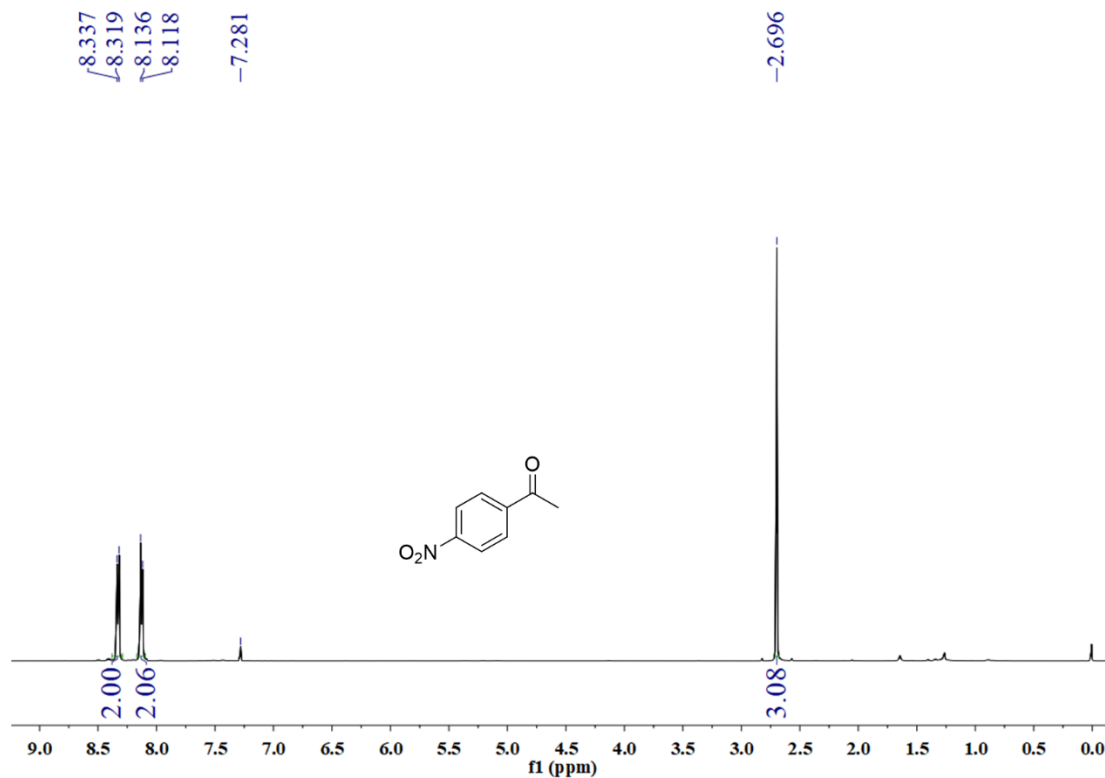

Figure S24  $^1\text{H}$  NMR spectrum of 4-Nitroacetophenone ( $\text{CDCl}_3$ , 500 MHz)

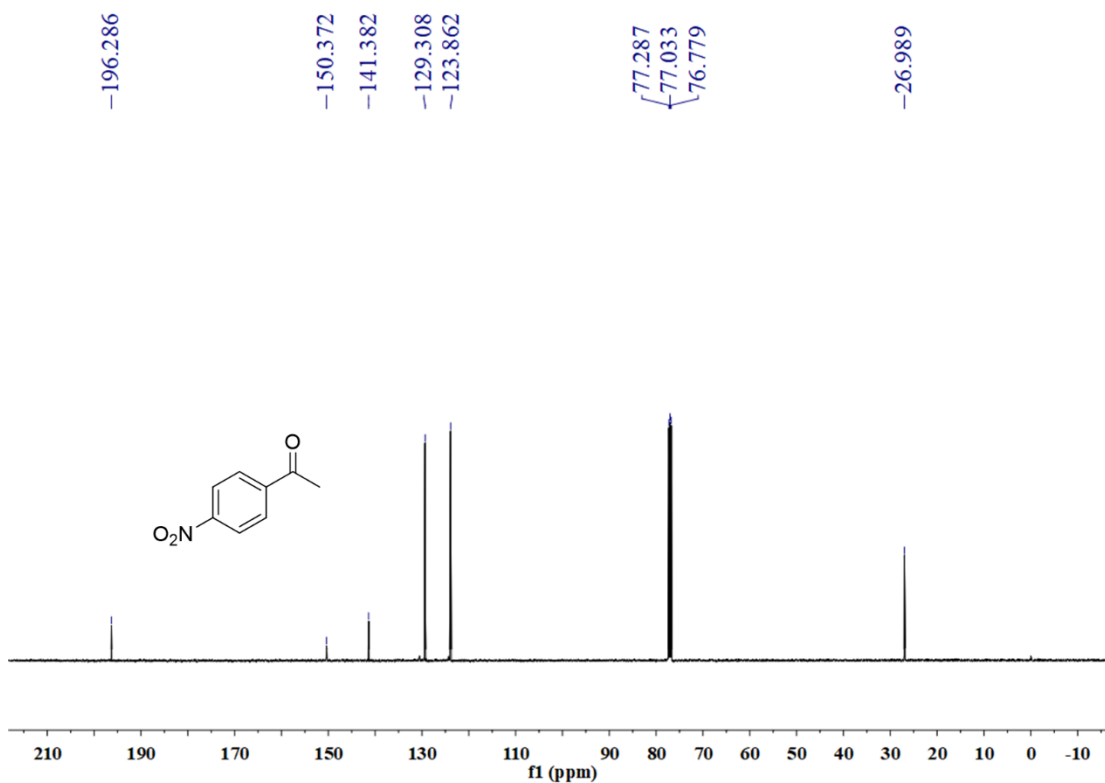

Figure S25  $^{13}\text{C}$  NMR spectrum of 4-Nitroacetophenone ( $\text{CDCl}_3$ , 125 MHz)

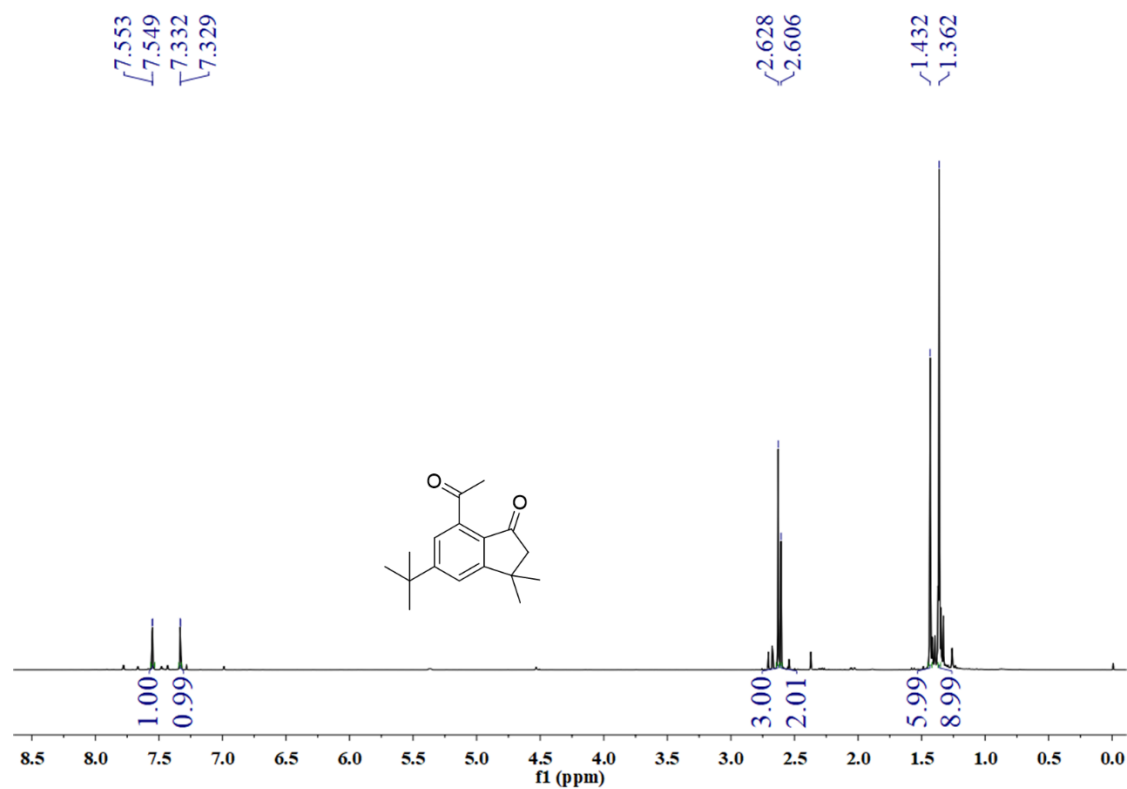

Figure S26  $^1\text{H}$  NMR spectrum of 7-acetyl-5-(tert-butyl)-3,3-dimethyl-2,3-dihydro-1H-inden-1-one (CDCl<sub>3</sub>, 500 MHz)

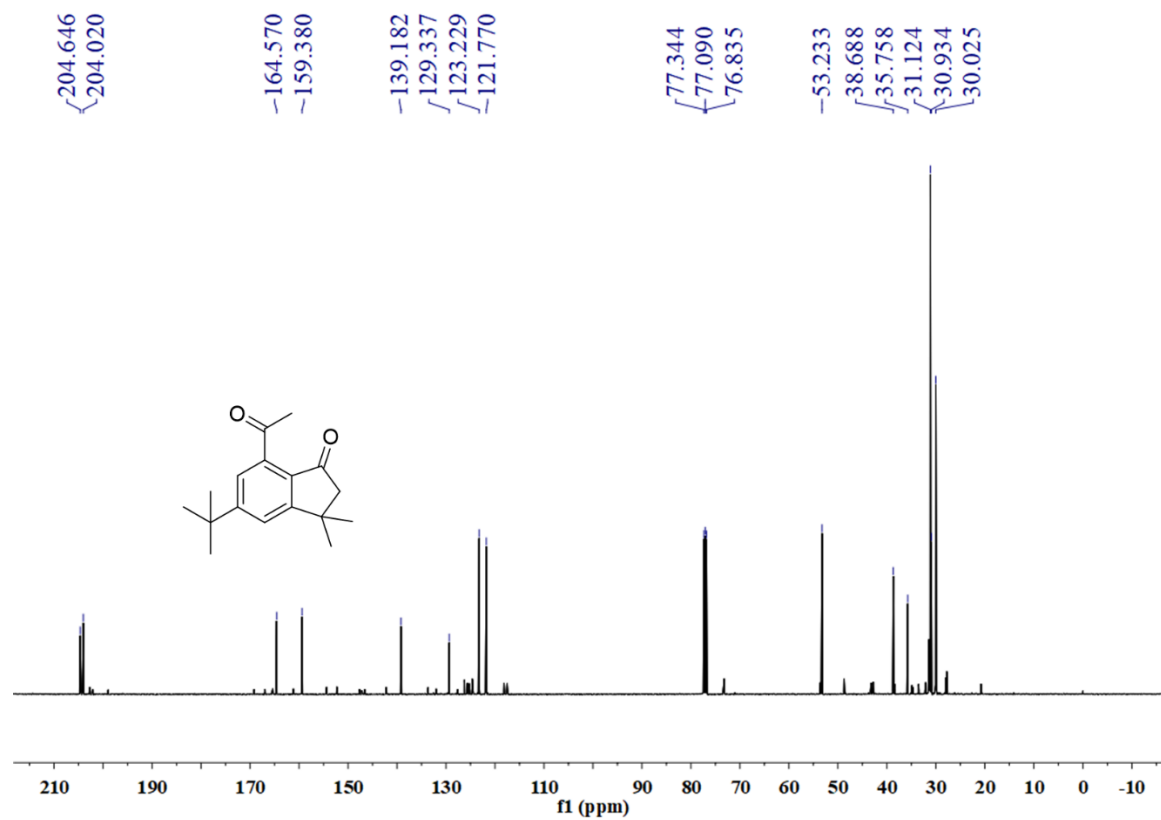

Figure S27  $^{13}\text{C}$  NMR spectrum of 7-acetyl-5-(tert-butyl)-3,3-dimethyl-2,3-dihydro-1H-inden-1-one (CDCl<sub>3</sub>, 125 MHz)

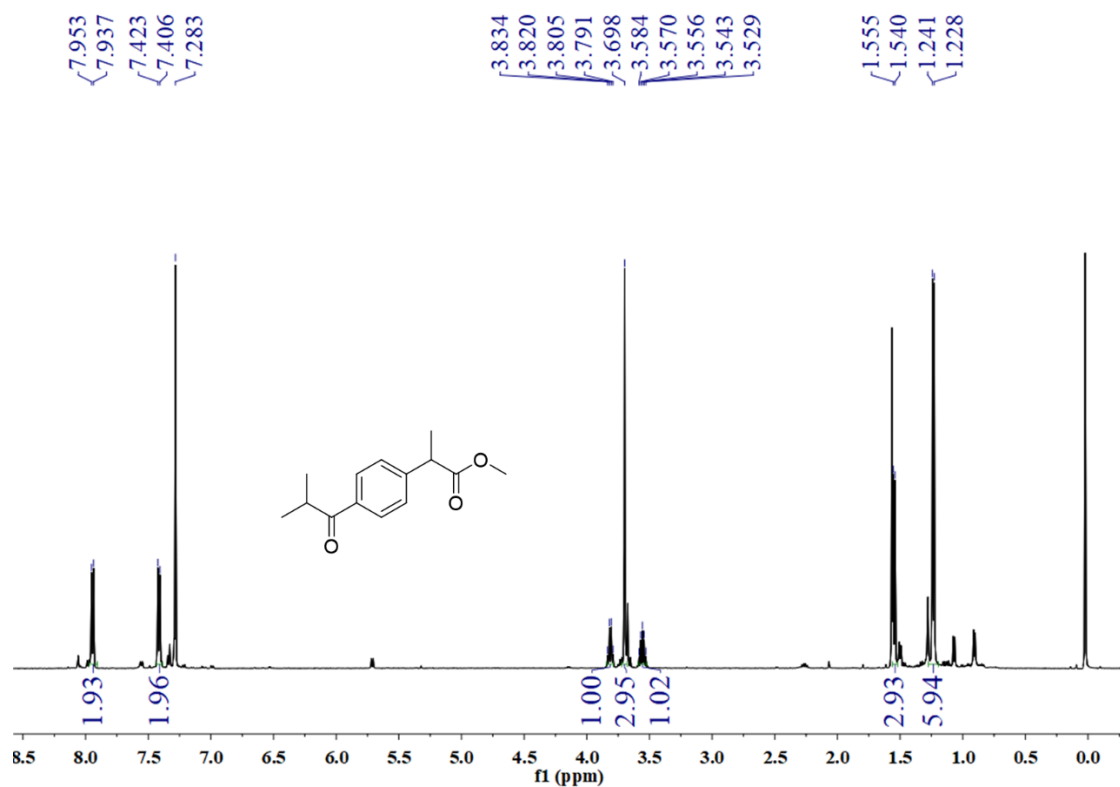

Figure S28 <sup>1</sup>H NMR spectrum of methyl 2-(4-isobutyrylphenyl)propanoate (CDCl<sub>3</sub>, 500 MHz)

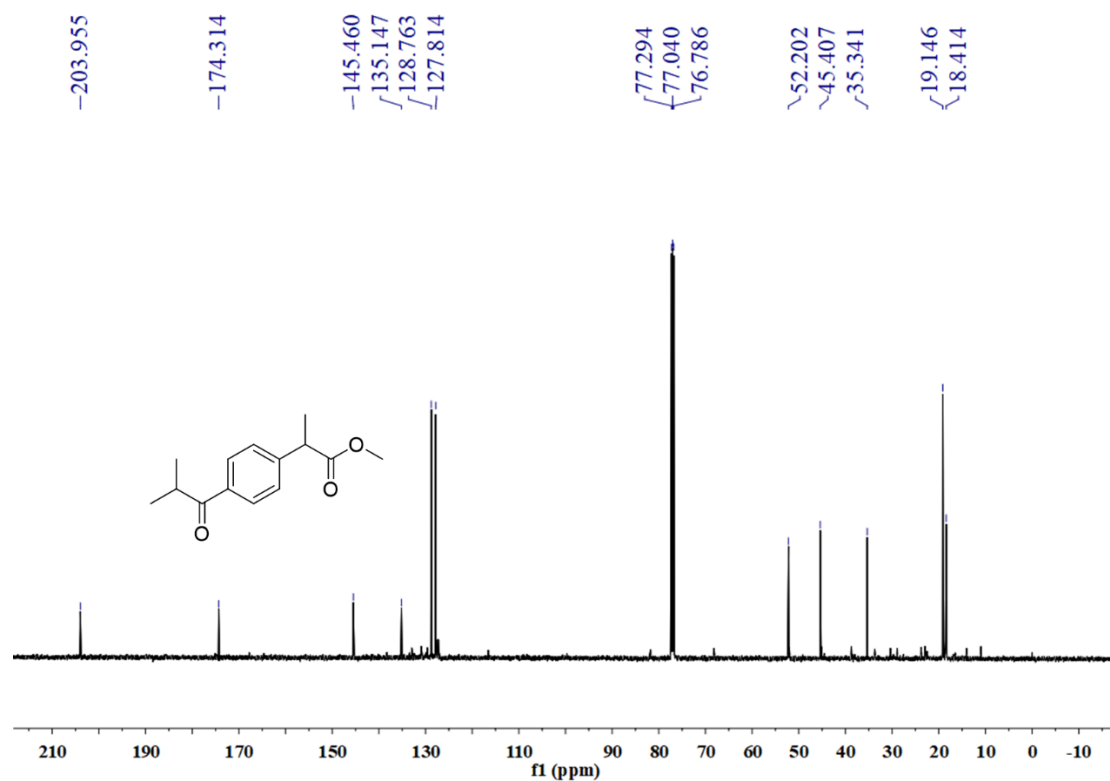

Figure S29 <sup>13</sup>C NMR spectrum of methyl 2-(4-isobutyrylphenyl)propanoate (CDCl<sub>3</sub>, 125 MHz)

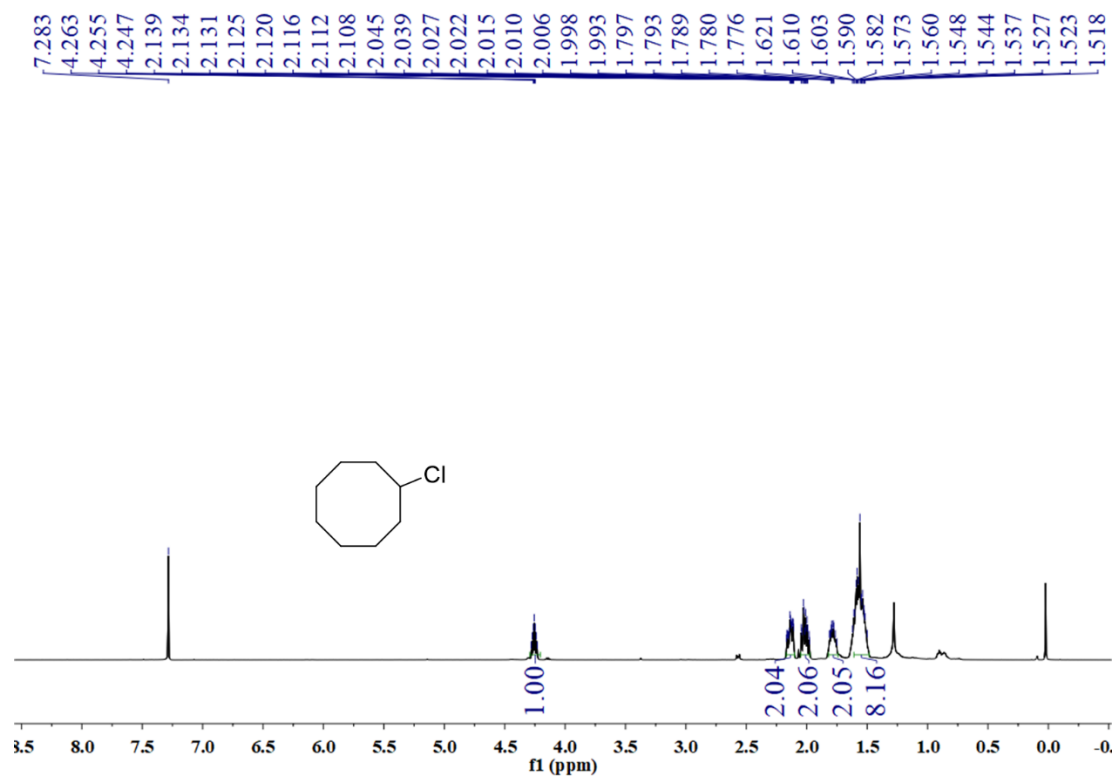

Figure S30 <sup>1</sup>H NMR spectrum of Chlorocyclooctane (CDCl<sub>3</sub>, 500 MHz)

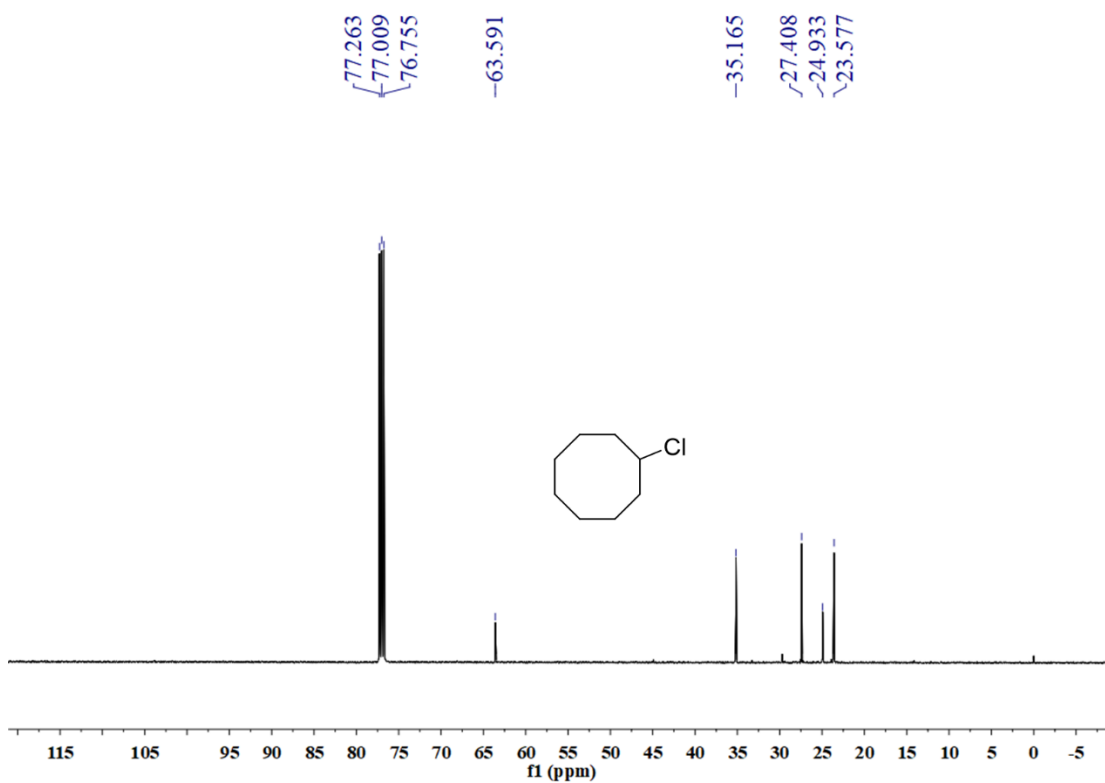

Figure S31 <sup>13</sup>C NMR spectrum of Chlorocyclooctane (CDCl<sub>3</sub>, 125 MHz)

## 5. X-ray Crystal Structure and Data of catalyst 1

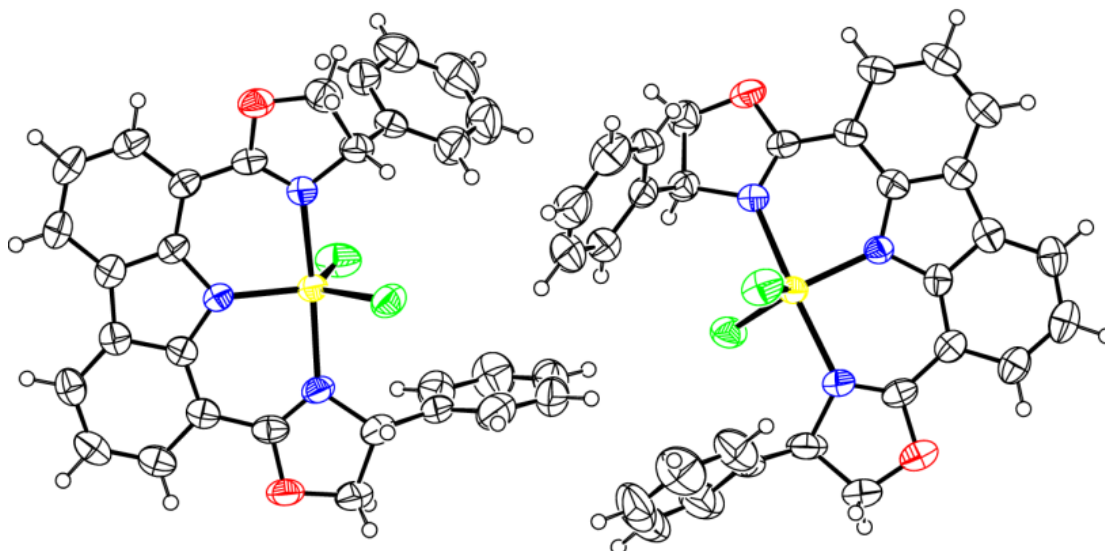

Figure S32 ORTEP diagram of **1**. Color code: carbon (grey), oxygen (red), nitrogen (blue)

**Table S1.** Crystal data for **1**

| Compound                        | <b>1</b>                                                                                                                              |
|---------------------------------|---------------------------------------------------------------------------------------------------------------------------------------|
| Empirical formula               | C <sub>30</sub> H <sub>22</sub> Cl <sub>2</sub> FeN <sub>3</sub> O <sub>2</sub>                                                       |
| Formula weight                  | 582.04                                                                                                                                |
| Temperature                     | 295(2) K                                                                                                                              |
| Crystal system                  | Triclinic                                                                                                                             |
| Space group                     | P-1                                                                                                                                   |
| Unit cell dimensions            | a = 11.3885(3) Å    alpha = 78.630(3) deg.<br>b = 13.9248(4) Å    beta = 79.475(3) deg.<br>c = 16.7200(7) Å    gamma = 89.481(2) deg. |
| Volume                          | 2554.73(15) Å <sup>3</sup>                                                                                                            |
| Z                               | 2                                                                                                                                     |
| Calculated density              | 1.516 g/cm <sup>3</sup>                                                                                                               |
| Absorption coefficient          | 0.836 mm <sup>-1</sup>                                                                                                                |
| F(000)                          | 1196                                                                                                                                  |
| Crystal size                    | 0.32 × 0.27 × 0.12 mm                                                                                                                 |
| Theta range for data collection | 1.8120 to 24.8150 deg.                                                                                                                |

### Accession Codes

CCDC 2086380 contains the supplementary crystallographic data for this paper. This data can be obtained free of charge via [www.ccdc.cam.ac.uk/data\\_request/cif](http://www.ccdc.cam.ac.uk/data_request/cif), or by emailing [data\\_request@ccdc.cam.ac.uk](mailto:data_request@ccdc.cam.ac.uk), or by contacting The Cambridge Crystallographic Data Centre, 12 Union Road, Cambridge CB2 1EZ, UK; fax: +44 1223 336033.

**Table S2.** Selected bond lengths for **1**

| Length/Å |
|----------|
|----------|

---

|           |             |
|-----------|-------------|
| Fe1A—C11A | 2.2760 (11) |
| Fe1A—C12A | 2.2208 (12) |
| Fe1A—N3A  | 1.976 (3)   |
| Fe1A—N2A  | 2.145 (3)   |
| Fe1A—N1A  | 2.152 (3)   |
| Fe1B—C11B | 2.2720 (12) |
| Fe1B—C12B | 2.2189 (12) |
| Fe1B—N3B  | 1.973 (3)   |
| Fe1B—N2B  | 2.143 (3)   |
| Fe1B—N1B  | 2.130 (3)   |
| O3B—C22B  | 1.352 (5)   |
| O3B—C23B  | 1.448 (5)   |
| O3A—C22A  | 1.358 (5)   |
| O3A—C23A  | 1.452 (5)   |
| O1B—C9B   | 1.343 (5)   |
| O1B—C8B   | 1.427 (5)   |
| N3B—C15B  | 1.382 (5)   |
| N3B—C16B  | 1.407 (5)   |
| O1A—C9A   | 1.359 (5)   |
| O1A—C8A   | 1.417 (5)   |
| N3A—C15A  | 1.397 (5)   |
| N3A—C16A  | 1.400 (5)   |
| N2A—C22A  | 1.283 (5)   |
| N2A—C24A  | 1.496 (5)   |
| N2B—C22B  | 1.292 (5)   |
| N2B—C24B  | 1.485 (5)   |
| N1A—C9A   | 1.288 (5)   |
| N1A—C1A   | 1.499 (5)   |
| N1B—C9B   | 1.296 (5)   |
| N1B—C1B   | 1.506 (5)   |
| C15B—C14B | 1.408 (5)   |
| C15B—C10B | 1.401 (5)   |
| C15A—C14A | 1.406 (5)   |
| C15A—C10A | 1.403 (5)   |
| C16B—C17B | 1.404 (5)   |
| C16B—C21B | 1.413 (5)   |
| C17A—C14A | 1.436 (6)   |
| C17A—C16A | 1.403 (5)   |
| C17A—C18A | 1.399 (6)   |
| C14B—C17B | 1.439 (6)   |
| C14B—C13B | 1.392 (6)   |
| C14A—C13A | 1.401 (6)   |
| C16A—C21A | 1.405 (5)   |
| C21A—C22A | 1.430 (5)   |

|           |           |
|-----------|-----------|
| C21A—C20A | 1.412 (5) |
| C17B—C18B | 1.403 (6) |
| C25A—C26A | 1.394 (6) |
| C25A—C24A | 1.504 (6) |
| C25A—C30A | 1.381 (6) |
| C21B—C22B | 1.436 (6) |
| C21B—C20B | 1.406 (5) |
| C9A—C10A  | 1.436 (6) |
| C25B—C24B | 1.511 (6) |
| C25B—C26B | 1.394 (6) |
| C25B—C30B | 1.387 (6) |
| C2B—C1B   | 1.498 (6) |
| C2B—C7B   | 1.376 (6) |
| C2B—C3B   | 1.371 (7) |
| C9B—C10B  | 1.443 (6) |
| C10B—C11B | 1.399 (5) |
| C10A—C11A | 1.396 (5) |
| C13B—C12B | 1.388 (6) |
| C2A—C1A   | 1.504 (7) |
| C2A—C7A   | 1.380 (7) |
| C2A—C3A   | 1.365 (7) |
| C20A—C19A | 1.375 (6) |
| C11B—C12B | 1.374 (6) |
| C26A—C27A | 1.372 (7) |
| C11A—C12A | 1.376 (6) |
| C13A—C12A | 1.374 (7) |
| C20B—C19B | 1.377 (6) |
| C18B—C19B | 1.390 (7) |
| C19A—C18A | 1.383 (7) |
| C23B—C24B | 1.541 (6) |
| C23A—C24A | 1.530 (6) |
| C26B—C27B | 1.371 (7) |
| C8B—C1B   | 1.534 (6) |
| C8A—C1A   | 1.542 (7) |
| C30A—C29A | 1.400 (8) |
| C30B—C29B | 1.385 (7) |
| C27A—C28A | 1.367 (8) |
| C7B—C6B   | 1.381 (8) |
| C5B—C6B   | 1.358 (8) |
| C5B—C4B   | 1.354 (8) |
| C3B—C4B   | 1.395 (7) |
| C7A—C6A   | 1.372 (8) |
| C27B—C28B | 1.370 (8) |
| C3A—C4A   | 1.378 (8) |

|           |            |
|-----------|------------|
| C29B—C28B | 1.344 (9)  |
| C29A—C28A | 1.361 (9)  |
| C6A—C5A   | 1.360 (10) |
| C5A—C4A   | 1.388 (9)  |

**Table S3.** Selected bond angles for **1**

|                | Angle (°)   |
|----------------|-------------|
| Cl2A—Fe1A—Cl1A | 121.72 (5)  |
| N3A—Fe1A—Cl1A  | 130.25 (10) |
| N3A—Fe1A—Cl2A  | 108.02 (10) |
| N3A—Fe1A—N2A   | 87.57 (12)  |
| N3A—Fe1A—N1A   | 88.59 (13)  |
| N2A—Fe1A—Cl1A  | 87.01 (9)   |
| N2A—Fe1A—Cl2A  | 95.56 (9)   |
| N2A—Fe1A—N1A   | 167.20 (13) |
| N1A—Fe1A—Cl1A  | 86.17 (9)   |
| N1A—Fe1A—Cl2A  | 97.25 (10)  |
| Cl2B—Fe1B—Cl1B | 121.70 (5)  |
| N3B—Fe1B—Cl1B  | 128.62 (9)  |
| N3B—Fe1B—Cl2B  | 109.68 (10) |
| N3B—Fe1B—N2B   | 88.29 (12)  |
| N3B—Fe1B—N1B   | 87.98 (13)  |
| N2B—Fe1B—Cl1B  | 87.16 (9)   |
| N2B—Fe1B—Cl2B  | 94.78 (9)   |
| N1B—Fe1B—Cl1B  | 86.98 (10)  |
| N1B—Fe1B—Cl2B  | 96.36 (10)  |
| N1B—Fe1B—N2B   | 168.86 (13) |
| C22B—O3B—C23B  | 106.7 (3)   |
| C22A—O3A—C23A  | 106.8 (3)   |
| C9B—O1B—C8B    | 106.1 (3)   |
| C15B—N3B—Fe1B  | 127.7 (3)   |
| C15B—N3B—C16B  | 104.7 (3)   |
| C16B—N3B—Fe1B  | 127.0 (3)   |
| C9A—O1A—C8A    | 106.4 (3)   |
| C15A—N3A—Fe1A  | 127.0 (2)   |
| C15A—N3A—C16A  | 104.7 (3)   |
| C16A—N3A—Fe1A  | 127.6 (3)   |
| C22A—N2A—Fe1A  | 127.6 (3)   |
| C22A—N2A—C24A  | 108.1 (3)   |
| C24A—N2A—Fe1A  | 124.3 (2)   |
| C22B—N2B—Fe1B  | 127.4 (3)   |
| C22B—N2B—C24B  | 108.1 (3)   |
| C24B—N2B—Fe1B  | 124.2 (2)   |



|                |           |
|----------------|-----------|
| C9A—N1A—Fe1A   | 125.6 (3) |
| C9A—N1A—C1A    | 107.9 (3) |
| C1A—N1A—Fe1A   | 125.3 (3) |
| C9B—N1B—Fe1B   | 127.1 (3) |
| C9B—N1B—C1B    | 107.0 (3) |
| C1B—N1B—Fe1B   | 124.9 (3) |
| N3B—C15B—C14B  | 112.3 (3) |
| N3B—C15B—C10B  | 128.0 (4) |
| C10B—C15B—C14B | 119.7 (3) |
| N3A—C15A—C14A  | 111.6 (3) |
| N3A—C15A—C10A  | 127.9 (3) |
| C10A—C15A—C14A | 120.4 (4) |
| N3B—C16B—C21B  | 128.5 (4) |
| C17B—C16B—N3B  | 111.2 (3) |
| C17B—C16B—C21B | 120.3 (3) |
| C16A—C17A—C14A | 106.3 (3) |
| C18A—C17A—C14A | 133.5 (4) |
| C18A—C17A—C16A | 120.2 (4) |
| C15B—C14B—C17B | 105.5 (3) |
| C13B—C14B—C15B | 120.5 (4) |
| C13B—C14B—C17B | 134.0 (4) |
| C15A—C14A—C17A | 105.9 (3) |
| C13A—C14A—C15A | 119.6 (4) |
| C13A—C14A—C17A | 134.5 (4) |
| N3A—C16A—C17A  | 111.5 (3) |
| N3A—C16A—C21A  | 127.6 (3) |
| C17A—C16A—C21A | 120.9 (3) |
| C16A—C21A—C22A | 121.2 (3) |
| C16A—C21A—C20A | 117.4 (4) |
| C20A—C21A—C22A | 121.4 (4) |
| C16B—C17B—C14B | 106.3 (3) |
| C18B—C17B—C16B | 120.5 (4) |
| C18B—C17B—C14B | 133.2 (4) |
| C26A—C25A—C24A | 121.6 (4) |
| C30A—C25A—C26A | 118.7 (4) |
| C30A—C25A—C24A | 119.7 (4) |
| C16B—C21B—C22B | 120.5 (3) |
| C20B—C21B—C16B | 117.5 (4) |
| C20B—C21B—C22B | 122.0 (4) |
| O1A—C9A—C10A   | 115.6 (4) |
| N1A—C9A—O1A    | 115.9 (4) |
| N1A—C9A—C10A   | 128.4 (4) |
| O3A—C22A—C21A  | 116.9 (3) |
| N2A—C22A—O3A   | 116.2 (4) |

|                |           |
|----------------|-----------|
| N2A—C22A—C21A  | 127.0 (3) |
| O3B—C22B—C21B  | 116.8 (3) |
| N2B—C22B—O3B   | 116.1 (4) |
| N2B—C22B—C21B  | 127.1 (3) |
| C26B—C25B—C24B | 121.5 (4) |
| C30B—C25B—C24B | 120.4 (4) |
| C30B—C25B—C26B | 118.1 (4) |
| C7B—C2B—C1B    | 119.7 (5) |
| C3B—C2B—C1B    | 122.2 (4) |
| C3B—C2B—C7B    | 118.0 (5) |
| O1B—C9B—C10B   | 116.3 (4) |
| N1B—C9B—O1B    | 116.8 (4) |
| N1B—C9B—C10B   | 126.9 (4) |
| C15B—C10B—C9B  | 120.9 (3) |
| C11B—C10B—C15B | 118.6 (4) |
| C11B—C10B—C9B  | 120.4 (4) |
| C15A—C10A—C9A  | 121.0 (3) |
| C11A—C10A—C15A | 117.8 (4) |
| C11A—C10A—C9A  | 121.1 (4) |
| C12B—C13B—C14B | 119.2 (4) |
| C7A—C2A—C1A    | 117.4 (5) |
| C3A—C2A—C1A    | 123.8 (4) |
| C3A—C2A—C7A    | 118.6 (5) |
| C19A—C20A—C21A | 121.2 (4) |
| C12B—C11B—C10B | 121.4 (4) |
| C27A—C26A—C25A | 120.4 (5) |
| C12A—C11A—C10A | 121.9 (4) |
| C12A—C13A—C14A | 119.8 (4) |
| C19B—C20B—C21B | 122.0 (4) |
| C19B—C18B—C17B | 119.0 (4) |
| C20B—C19B—C18B | 120.6 (4) |
| C20A—C19A—C18A | 121.5 (4) |
| O3B—C23B—C24B  | 104.1 (3) |
| O3A—C23A—C24A  | 104.4 (3) |
| C19A—C18A—C17A | 118.7 (4) |
| N2B—C24B—C25B  | 111.7 (3) |
| N2B—C24B—C23B  | 102.2 (3) |
| C25B—C24B—C23B | 115.0 (3) |
| N2A—C24A—C25A  | 111.4 (3) |
| N2A—C24A—C23A  | 102.5 (3) |
| C25A—C24A—C23A | 114.8 (4) |
| C27B—C26B—C25B | 121.2 (5) |
| C11B—C12B—C13B | 120.6 (4) |
| C13A—C12A—C11A | 120.3 (4) |

|                |           |
|----------------|-----------|
| O1B—C8B—C1B    | 105.7 (3) |
| N1B—C1B—C8B    | 100.5 (3) |
| C2B—C1B—N1B    | 117.4 (4) |
| C2B—C1B—C8B    | 111.4 (4) |
| O1A—C8A—C1A    | 105.5 (4) |
| C25A—C30A—C29A | 120.1 (5) |
| N1A—C1A—C2A    | 117.9 (4) |
| N1A—C1A—C8A    | 100.3 (4) |
| C2A—C1A—C8A    | 111.5 (4) |
| C29B—C30B—C25B | 119.4 (5) |
| C28A—C27A—C26A | 120.5 (5) |
| C2B—C7B—C6B    | 121.5 (6) |
| C4B—C5B—C6B    | 120.0 (6) |
| C2B—C3B—C4B    | 120.2 (5) |
| C6A—C7A—C2A    | 120.3 (6) |
| C5B—C6B—C7B    | 119.7 (5) |
| C28B—C27B—C26B | 119.6 (5) |
| C2A—C3A—C4A    | 121.1 (5) |
| C28B—C29B—C30B | 121.6 (6) |
| C28A—C29A—C30A | 119.9 (5) |
| C5A—C6A—C7A    | 121.6 (6) |
| C29A—C28A—C27A | 120.4 (5) |
| C6A—C5A—C4A    | 118.2 (6) |
| C5B—C4B—C3B    | 120.5 (6) |
| C29B—C28B—C27B | 120.2 (5) |
| C3A—C4A—C5A    | 120.2 (7) |

---

## 6. References

1. W. Chen, Q. Yang, T. Zhou, Q. Tian, and G. Zhang. *Org. Lett.*, **2015**, *21*, 5236.
2. T. Niwa and M. Nakada. *J. Am. Chem. Soc.*, **2012**, *33*, 13538.
3. O. V. Dolomanov, L. J. Bourhis, R. J. Gildea, J. A. K. Howard and H. Puschmann. *J. Appl. Crystallogr.*, **2009**, *42*, 339.
4. G. M. Sheldrick, *Acta Crystallogr, Sect. C: Struct. Chem.*, **2015**, *71*, 3.
5. K. Kamata, K. Yonehara, Y. Nagakawa, K. Uehara, and N. Mizuno, *Nat. Chem.*, **2010**, *2*, 478.
6. R. K. Quinn, Z. A. Könst, S. E. Michalak, Y. Schmidt, A. R. Szklarski, A. R. Flores, S. Nam, D. A. Horne, C. D. Vanderwal, and E. J. Alexanian. *J. Am. Chem. Soc.*, **2016**, *138*, 696
